# Supplementary material
Source: publisher site journal article supplement (http://www.spandidos-publications.com/1916/downloadSupplementary)
Supplement: Supplementary file 1 [file downloadSupplementary]

## Sheet: coexpression correlation
Table SIV. lncRNA-mRNA coexpression network analysis of differentially expressed genes between normal aortas and Marfan syndrome tissues.
Gene1	Gene1_Type	Gene2	Gene2_Type	Relation	P.Value	Regulation
uc004afc.2	ncRNA	SOCS3	protein_coding	0.981125	9.30555e-05	Positive
linc-TCERG1L-1	ncRNA	VPREB3	protein_coding	0.98447	5.72434e-05	Positive
ATP6V1D	protein_coding	uc004afc.2	ncRNA	0.981687	8.63141e-05	Positive
BIVM	protein_coding	X54707	ncRNA	-0.983414	6.74408e-05	Negative
BC029474	ncRNA	JUNB	protein_coding	0.98948	2.16778e-05	Positive
BC029474	ncRNA	RGS2	protein_coding	0.985134	5.13449e-05	Positive
BC029474	ncRNA	NR4A2	protein_coding	0.981653	8.67105e-05	Positive
MIS18BP1	protein_coding	BC029474	ncRNA	0.986372	4.13351e-05	Positive
linc_luo_1076	ncRNA	FGF7	protein_coding	0.982858	7.32131e-05	Positive
CHD1	protein_coding	BC029474	ncRNA	0.993314	6.9947e-06	Positive
RP5-826L7.1	ncRNA	PIP5K1C	protein_coding	-0.983743	6.41631e-05	Negative
RP5-826L7.1	ncRNA	ALG13	protein_coding	0.980325	0.000103189	Positive
HSPB1	protein_coding	linc-ANKRD20A1-14	ncRNA	-0.982432	7.78296e-05	Negative
linc_luo_1183	ncRNA	CCNL1	protein_coding	0.983868	6.29371e-05	Positive
linc_luo_1183	ncRNA	C6orf15	protein_coding	-0.98	0.000107482	Negative
linc_luo_1183	ncRNA	PIP5K1C	protein_coding	-0.991952	1.1113e-05	Negative
linc_luo_1183	ncRNA	HSPB1	protein_coding	-0.992894	8.14446e-06	Negative
linc-GRB14	ncRNA	PTGS2	protein_coding	0.982336	7.88914e-05	Positive
linc-GRB14	ncRNA	BTG2	protein_coding	0.985942	4.46629e-05	Positive
BRE-AS1	ncRNA	VPREB3	protein_coding	-0.985663	4.69114e-05	Negative
EGR3	protein_coding	linc-GRB14	ncRNA	0.982406	7.81233e-05	Positive
ZFP36	protein_coding	linc_luo_1076	ncRNA	0.985076	5.18414e-05	Positive
CR609342	ncRNA	CCNL1	protein_coding	0.981014	9.44267e-05	Positive
CR609342	ncRNA	FOSB	protein_coding	0.988399	2.76667e-05	Positive
CR609342	ncRNA	HSPB1	protein_coding	-0.98836	2.79041e-05	Negative
linc-TBCB	ncRNA	CCNL1	protein_coding	-0.982924	7.25207e-05	Negative
linc-TBCB	ncRNA	C6orf15	protein_coding	0.987941	3.04713e-05	Positive
RGPD6	protein_coding	linc_luo_1183	ncRNA	0.980768	9.75037e-05	Positive
RGPD6	protein_coding	CR609342	ncRNA	0.985748	4.62189e-05	Positive
KB-1930G5.3	ncRNA	ALG13	protein_coding	-0.988468	2.72601e-05	Negative
linc-ARHGAP11B-2	ncRNA	SOCS3	protein_coding	-0.980555	0.000100215	Negative
linc-ARHGAP11B-2	ncRNA	VPREB3	protein_coding	0.990696	1.59588e-05	Positive
CD46	protein_coding	BC029474	ncRNA	0.986685	3.90116e-05	Positive
CD46	protein_coding	KB-1930G5.3	ncRNA	-0.984176	5.99827e-05	Negative
ADRA2C	protein_coding	linc_luo_1076	ncRNA	-0.982271	7.96241e-05	Negative
RBM26	protein_coding	linc-JAK1-1	ncRNA	0.983016	7.15511e-05	Positive
RBM26	protein_coding	KB-1930G5.3	ncRNA	-0.984231	5.94678e-05	Negative
RASGEF1B	protein_coding	BC029474	ncRNA	0.987476	3.34906e-05	Positive
BCLAF1	protein_coding	AC017002.4	ncRNA	-0.983176	6.98774e-05	Negative
AC138035.1	ncRNA	GAS2L3	protein_coding	0.98312	7.04641e-05	Positive
ZNF678	protein_coding	BC029474	ncRNA	0.980684	9.85702e-05	Positive
ZNF678	protein_coding	linc-GRB14	ncRNA	0.992469	9.41519e-06	Positive
NAP1L1	protein_coding	linc_luo_1076	ncRNA	0.9889	2.47831e-05	Positive
ZNF226	protein_coding	uc004afc.2	ncRNA	0.980175	0.000105164	Positive
ZNF226	protein_coding	linc-TCERG1L-1	ncRNA	-0.996735	1.16748e-06	Negative
ZNF226	protein_coding	X54707	ncRNA	-0.986101	4.34174e-05	Negative
ZNF226	protein_coding	BRE-AS1	ncRNA	0.980803	9.70657e-05	Positive
ZNF226	protein_coding	linc-ARHGAP11B-2	ncRNA	-0.987557	3.29508e-05	Negative
C6orf15	protein_coding	linc_luo_1183	ncRNA	-0.982512	7.69526e-05	Negative
ZNF280D	protein_coding	BC029474	ncRNA	0.981305	9.08643e-05	Positive
ZNF280D	protein_coding	AC017002.4	ncRNA	-0.994212	4.88064e-06	Negative
ATF7IP	protein_coding	linc_luo_1183	ncRNA	0.988455	2.73343e-05	Positive
MIS18BP1	protein_coding	linc_luo_1076	ncRNA	0.983069	7.09914e-05	Positive
linc-FAM108B1	ncRNA	HSPB1	protein_coding	0.983121	7.04523e-05	Positive
linc-C14orf102-1	ncRNA	ASB2	protein_coding	0.990253	1.79229e-05	Positive
linc-C14orf102-1	ncRNA	REL	protein_coding	-0.981525	8.82322e-05	Negative
linc-C14orf102-1	ncRNA	ADRA2C	protein_coding	0.991295	1.35179e-05	Positive
linc-C14orf102-1	ncRNA	RASGEF1B	protein_coding	-0.991035	1.45457e-05	Negative
linc-C14orf102-1	ncRNA	RAPGEF5	protein_coding	-0.982053	8.2083e-05	Negative
CAPRIN2	protein_coding	RP5-826L7.1	ncRNA	0.986295	4.19239e-05	Positive
uc003xel.1	ncRNA	KCNIP3	protein_coding	-0.9916	1.23669e-05	Negative
uc003xel.1	ncRNA	GALNT16	protein_coding	-0.988681	2.60223e-05	Negative
CLOCK	protein_coding	BC029474	ncRNA	0.987773	3.15453e-05	Positive
CLOCK	protein_coding	linc-C14orf102-1	ncRNA	-0.988183	2.89693e-05	Negative
EGR2	protein_coding	AF086507	ncRNA	0.983154	7.01045e-05	Positive
RP11-259O2.3	ncRNA	ALG13	protein_coding	0.980249	0.000104193	Positive
RP11-259O2.3	ncRNA	CAPRIN2	protein_coding	0.995501	2.60119e-06	Positive
linc-PLD5-4	ncRNA	CARTPT	protein_coding	-0.980232	0.000104411	Negative
linc-PLD5-4	ncRNA	ATF7IP	protein_coding	0.98051	0.000100797	Positive
DYNC2H1	protein_coding	linc-JAK1-1	ncRNA	0.985604	4.73902e-05	Positive
DYNC2H1	protein_coding	KB-1930G5.3	ncRNA	-0.987485	3.34294e-05	Negative
linc_luo_1013	ncRNA	CCNL1	protein_coding	0.9958	2.19037e-06	Positive
linc_luo_1013	ncRNA	C6orf15	protein_coding	-0.981786	8.51547e-05	Negative
linc_luo_1013	ncRNA	PIP5K1C	protein_coding	-0.98197	8.30286e-05	Negative
linc_luo_1013	ncRNA	CAPRIN2	protein_coding	0.994222	4.85809e-06	Positive
KCTD9	protein_coding	linc_luo_1076	ncRNA	0.982511	7.69677e-05	Positive
SOHLH1	protein_coding	X54707	ncRNA	0.984671	5.54179e-05	Positive
SOHLH1	protein_coding	BC029474	ncRNA	-0.985645	4.70588e-05	Negative
linc_luo_1161	ncRNA	ALG13	protein_coding	0.995434	2.69884e-06	Positive
linc_luo_1161	ncRNA	CD46	protein_coding	0.996593	1.2994e-06	Positive
linc_luo_1161	ncRNA	RBM26	protein_coding	0.990626	1.62602e-05	Positive
linc_luo_1161	ncRNA	ZNF280D	protein_coding	0.984866	5.36819e-05	Positive
linc_luo_1161	ncRNA	THOC1	protein_coding	0.986215	4.25383e-05	Positive
linc_luo_1161	ncRNA	DYNC2H1	protein_coding	0.987501	3.3322e-05	Positive
linc_luo_1161	ncRNA	SOHLH1	protein_coding	-0.982474	7.73707e-05	Negative
C9orf72	protein_coding	linc-AKT3-4	ncRNA	-0.984856	5.37646e-05	Negative
RP11-586L23.1	ncRNA	BCLAF1	protein_coding	-0.9842	5.97611e-05	Negative
RP11-586L23.1	ncRNA	ZNF280D	protein_coding	-0.981324	9.06409e-05	Negative
RP11-586L23.1	ncRNA	THOC1	protein_coding	-0.981478	8.87904e-05	Negative
BRE-AS1	ncRNA	ZNF226	protein_coding	0.98612	4.32682e-05	Positive
HLA-C	protein_coding	linc_luo_1161	ncRNA	0.982493	7.71618e-05	Positive
linc-PEX13	ncRNA	PPP1R15B	protein_coding	0.983045	7.12457e-05	Positive
linc-PEX13	ncRNA	ZFAND5	protein_coding	0.98579	4.58839e-05	Positive
DES	protein_coding	BC029474	ncRNA	-0.997636	5.21407e-07	Negative
DES	protein_coding	linc_luo_1161	ncRNA	-0.981929	8.35058e-05	Negative
DUSP27	protein_coding	linc-C14orf102-1	ncRNA	0.984018	6.14855e-05	Positive
linc-LBX1-2	ncRNA	CCNL1	protein_coding	-0.988088	2.95577e-05	Negative
linc-LBX1-2	ncRNA	PIP5K1C	protein_coding	0.985618	4.72753e-05	Positive
linc-LBX1-2	ncRNA	ATF7IP	protein_coding	-0.982769	7.41692e-05	Negative
linc-LBX1-2	ncRNA	CAPRIN2	protein_coding	-0.987563	3.29087e-05	Negative
TRPM7	protein_coding	BC029474	ncRNA	0.985598	4.74415e-05	Positive
TRPM7	protein_coding	KB-1930G5.3	ncRNA	-0.980667	9.87808e-05	Negative
TRPM7	protein_coding	linc_luo_1161	ncRNA	0.997996	3.44789e-07	Positive
ATP11C	protein_coding	BC029474	ncRNA	0.985538	4.79319e-05	Positive
ATP11C	protein_coding	linc-C14orf102-1	ncRNA	-0.993253	7.1552e-06	Negative
LARP7	protein_coding	linc-TCERG1L-1	ncRNA	-0.981794	8.50687e-05	Negative
LARP7	protein_coding	X54707	ncRNA	-0.987854	3.1026e-05	Negative
LARP7	protein_coding	BRE-AS1	ncRNA	0.98421	5.96696e-05	Positive
U2SURP	protein_coding	BC029474	ncRNA	0.985374	4.92983e-05	Positive
ZNF107	protein_coding	linc-AKT3-4	ncRNA	-0.987442	3.3712e-05	Negative
PTPN12	protein_coding	linc-PLD5-4	ncRNA	0.998304	2.2717e-07	Positive
PPIP5K2	protein_coding	BC029474	ncRNA	0.986135	4.31502e-05	Positive
PPIP5K2	protein_coding	AC017002.4	ncRNA	-0.986997	3.67706e-05	Negative
PPIP5K2	protein_coding	linc_luo_1161	ncRNA	0.988879	2.49024e-05	Positive
PPIP5K2	protein_coding	RP11-586L23.1	ncRNA	-0.981655	8.66867e-05	Negative
IFT80	protein_coding	AC017002.4	ncRNA	-0.980635	9.91938e-05	Negative
linc_luo_1157	ncRNA	KCNIP3	protein_coding	-0.982076	8.1824e-05	Negative
NR4A1	protein_coding	X54707	ncRNA	-0.981622	8.7073e-05	Negative
CAPRIN2	protein_coding	RP11-259O2.3	ncRNA	0.985641	4.70866e-05	Positive
CAPRIN2	protein_coding	linc_luo_1013	ncRNA	0.98486	5.37346e-05	Positive
RASA2	protein_coding	RP11-259O2.3	ncRNA	0.985698	4.66227e-05	Positive
RASA2	protein_coding	linc_luo_1013	ncRNA	0.985534	4.79644e-05	Positive
RASA2	protein_coding	linc_luo_1161	ncRNA	0.982378	7.84255e-05	Positive
linc-TOR1AIP2-3	ncRNA	CPAMD8	protein_coding	0.981339	9.0453e-05	Positive
linc-TOR1AIP2-3	ncRNA	RB1CC1	protein_coding	-0.983123	7.04331e-05	Negative
linc-TEKT4-1	ncRNA	CCNL1	protein_coding	0.982838	7.3432e-05	Positive
linc-TEKT4-1	ncRNA	CAPRIN2	protein_coding	0.991115	1.42243e-05	Positive
linc-TEKT4-1	ncRNA	C9orf72	protein_coding	0.98622	4.24943e-05	Positive
linc-TEKT4-1	ncRNA	RASA2	protein_coding	0.986595	3.96723e-05	Positive
NDUFB2	protein_coding	RP11-259O2.3	ncRNA	0.985284	5.00618e-05	Positive
CCNH	protein_coding	RP11-586L23.1	ncRNA	-0.981618	8.71257e-05	Negative
RGPD1	protein_coding	BC029474	ncRNA	0.992119	1.0545e-05	Positive
RGPD1	protein_coding	linc_luo_1161	ncRNA	0.981156	9.26769e-05	Positive
TAS2R19	protein_coding	linc-JAK1-1	ncRNA	0.987401	3.39916e-05	Positive
NEMF	protein_coding	X54707	ncRNA	-0.985662	4.69211e-05	Negative
AL079289	ncRNA	PLGLB1	protein_coding	0.980139	0.000105643	Positive
ZNF141	protein_coding	linc-JAK1-1	ncRNA	0.995359	2.8109e-06	Positive
JMJD1C	protein_coding	BC029474	ncRNA	0.982144	8.10436e-05	Positive
JMJD1C	protein_coding	AC017002.4	ncRNA	-0.988767	2.55292e-05	Negative
SELE	protein_coding	linc-GRB14	ncRNA	0.988085	2.95731e-05	Positive
CEP162	protein_coding	AC017002.4	ncRNA	-0.981429	8.93678e-05	Negative
ENST00000399971	ncRNA	ALG13	protein_coding	0.98002	0.000107222	Positive
linc-SLC39A10-10	ncRNA	ICAM1	protein_coding	0.980058	0.000106713	Positive
linc-SLC39A10-10	ncRNA	IL6	protein_coding	0.995447	2.68005e-06	Positive
linc-SLC39A10-10	ncRNA	PTPN12	protein_coding	0.991064	1.44278e-05	Positive
LY75	protein_coding	linc_luo_1076	ncRNA	0.993113	7.53263e-06	Positive
LY75	protein_coding	linc-C14orf102-1	ncRNA	-0.983496	6.66149e-05	Negative
LY75	protein_coding	linc-PEX13	ncRNA	0.981843	8.44997e-05	Positive
uc003tau.2	ncRNA	ITM2C	protein_coding	-0.980378	0.000102498	Negative
linc_luo_795	ncRNA	CAPN7	protein_coding	0.985154	5.1166e-05	Positive
linc_luo_795	ncRNA	THOC1	protein_coding	0.990611	1.63224e-05	Positive
linc_luo_795	ncRNA	HLA-C	protein_coding	0.987349	3.4341e-05	Positive
linc_luo_795	ncRNA	RASA2	protein_coding	0.985625	4.72168e-05	Positive
linc_luo_795	ncRNA	CCNH	protein_coding	0.998071	3.13662e-07	Positive
linc_luo_795	ncRNA	ZNF638	protein_coding	0.984383	5.80488e-05	Positive
MIR548D1	ncRNA	CAPRIN2	protein_coding	0.997577	5.54091e-07	Positive
MIR548D1	ncRNA	NDUFB2	protein_coding	0.983552	6.6056e-05	Positive
linc-OR4F29-1	ncRNA	BIVM	protein_coding	0.983702	6.45611e-05	Positive
linc-OR4F29-1	ncRNA	CD46	protein_coding	0.98156	8.78167e-05	Positive
linc-OR4F29-1	ncRNA	RBM26	protein_coding	0.981665	8.6571e-05	Positive
linc-OR4F29-1	ncRNA	TRPM7	protein_coding	0.980167	0.000105273	Positive
CR596712	ncRNA	ASB2	protein_coding	0.984331	5.85291e-05	Positive
CR625890	ncRNA	CCNL1	protein_coding	0.992067	1.07206e-05	Positive
CR625890	ncRNA	C6orf15	protein_coding	-0.991252	1.36813e-05	Negative
SENP7	protein_coding	linc-JAK1-1	ncRNA	0.988338	2.80322e-05	Positive
SENP7	protein_coding	AL079289	ncRNA	0.982356	7.86708e-05	Positive
PYGB	protein_coding	BC029474	ncRNA	-0.989451	2.18273e-05	Negative
EML4	protein_coding	linc-TEKT4-1	ncRNA	0.98777	3.15645e-05	Positive
SKIV2L2	protein_coding	BC029474	ncRNA	0.983601	6.55651e-05	Positive
U54734	ncRNA	TAS2R20	protein_coding	0.995191	3.07239e-06	Positive
U54734	ncRNA	DYNC2H1	protein_coding	0.982072	8.18673e-05	Positive
U54734	ncRNA	TAS2R50	protein_coding	0.982073	8.18497e-05	Positive
TAS2R13	protein_coding	linc-PLD5-4	ncRNA	0.986697	3.89211e-05	Positive
TAS2R13	protein_coding	linc_luo_1013	ncRNA	0.9822	8.04218e-05	Positive
TAS2R13	protein_coding	linc-LBX1-2	ncRNA	-0.98763	3.24716e-05	Negative
NSUN6	protein_coding	RP5-826L7.1	ncRNA	0.994636	4.03589e-06	Positive
NSUN6	protein_coding	KB-1930G5.3	ncRNA	-0.98125	9.15301e-05	Negative
NSUN6	protein_coding	RP11-259O2.3	ncRNA	0.987333	3.44509e-05	Positive
CXCL8	protein_coding	AF086507	ncRNA	0.982757	7.42977e-05	Positive
uc003jox.1	ncRNA	KIAA1033	protein_coding	0.991319	1.34241e-05	Positive
uc003jox.1	ncRNA	CPAMD8	protein_coding	-0.984839	5.39161e-05	Negative
uc003jox.1	ncRNA	KCTD9	protein_coding	0.987143	3.57538e-05	Positive
uc003jox.1	ncRNA	RGS16	protein_coding	0.997296	7.29006e-07	Positive
uc003jox.1	ncRNA	IL1B	protein_coding	0.98515	5.12045e-05	Positive
uc003jox.1	ncRNA	DUSP27	protein_coding	-0.982242	7.99404e-05	Negative
uc003jox.1	ncRNA	ST6GALNAC5	protein_coding	0.987488	3.34096e-05	Positive
FLNC	protein_coding	BC029474	ncRNA	-0.982361	7.86172e-05	Negative
KTN1	protein_coding	uc011bfh.1	ncRNA	0.986226	4.24494e-05	Positive
SMC5	protein_coding	AC017002.4	ncRNA	-0.980977	9.4888e-05	Negative
SMC5	protein_coding	linc_luo_1161	ncRNA	0.98504	5.21536e-05	Positive
linc-PAX8-3	ncRNA	KIAA1033	protein_coding	0.992721	8.64837e-06	Positive
linc-PAX8-3	ncRNA	CPAMD8	protein_coding	-0.983469	6.68916e-05	Negative
linc-PAX8-3	ncRNA	RGS16	protein_coding	0.994234	4.83372e-06	Positive
linc-PAX8-3	ncRNA	DUSP27	protein_coding	-0.98797	3.02936e-05	Negative
linc-PAX8-3	ncRNA	ST6GALNAC5	protein_coding	0.996932	9.99355e-07	Positive
BAG2	protein_coding	RP4-614C15.2	ncRNA	0.989789	2.01239e-05	Positive
BAG2	protein_coding	AC100848.1	ncRNA	-0.982132	8.11858e-05	Negative
ZNF331	protein_coding	linc-PAX8-3	ncRNA	0.985878	4.51782e-05	Positive
APCDD1	protein_coding	linc-C14orf102-1	ncRNA	0.984803	5.42336e-05	Positive
APCDD1	protein_coding	linc-SLC39A10-10	ncRNA	-0.98039	0.000102346	Negative
APCDD1	protein_coding	uc003jox.1	ncRNA	-0.986724	3.87293e-05	Negative
GCC2	protein_coding	uc003jox.1	ncRNA	0.989578	2.11782e-05	Positive
GCC2	protein_coding	linc-PAX8-3	ncRNA	0.993466	6.60611e-06	Positive
X92108	ncRNA	KCNIP3	protein_coding	-0.98645	4.07521e-05	Negative
X92108	ncRNA	GALNT16	protein_coding	-0.984282	5.89868e-05	Negative
AOC3	protein_coding	MIR548D1	ncRNA	-0.98132	9.06892e-05	Negative
PPP1R15B	protein_coding	linc_luo_1076	ncRNA	0.988314	2.81753e-05	Positive
ZFYVE16	protein_coding	BC029474	ncRNA	0.980077	0.000106463	Positive
ZFYVE16	protein_coding	AC017002.4	ncRNA	-0.981076	9.36573e-05	Negative
linc-AMPD2	ncRNA	PIP5K1C	protein_coding	-0.980174	0.000105179	Negative
linc-AMPD2	ncRNA	ALG13	protein_coding	0.99451	4.27761e-06	Positive
linc-AMPD2	ncRNA	RBM26	protein_coding	0.991876	1.13761e-05	Positive
linc-AMPD2	ncRNA	DYNC2H1	protein_coding	0.987893	3.07757e-05	Positive
linc-AMPD2	ncRNA	ORC2	protein_coding	0.980075	0.000106486	Positive
linc-AMPD2	ncRNA	HLA-C	protein_coding	0.987962	3.03434e-05	Positive
linc-AMPD2	ncRNA	RASA2	protein_coding	0.984011	6.15553e-05	Positive
linc-AMPD2	ncRNA	ZNF638	protein_coding	0.981557	8.78514e-05	Positive
linc-AMPD2	ncRNA	NSUN6	protein_coding	0.990359	1.74394e-05	Positive
NTN1	protein_coding	linc-C14orf102-1	ncRNA	0.988845	2.50889e-05	Positive
ANKRD44	protein_coding	linc-PLD5-4	ncRNA	0.980851	9.64598e-05	Positive
ANKRD44	protein_coding	linc_luo_1161	ncRNA	0.983586	6.5716e-05	Positive
CLEC2D	protein_coding	linc-CASP10-1	ncRNA	0.983097	7.06992e-05	Positive
CLEC2D	protein_coding	linc-FAM108B1	ncRNA	-0.990277	1.781e-05	Negative
IL31RA	protein_coding	linc-REXO1L1	ncRNA	0.980416	0.000102008	Positive
SLC2A3	protein_coding	linc-PAX8-3	ncRNA	0.983231	6.93157e-05	Positive
C12orf4	protein_coding	BC029474	ncRNA	0.991463	1.28755e-05	Positive
C12orf4	protein_coding	linc-C14orf102-1	ncRNA	-0.98212	8.13261e-05	Negative
CENPC	protein_coding	AC017002.4	ncRNA	-0.981877	8.40983e-05	Negative
CENPC	protein_coding	RP11-586L23.1	ncRNA	-0.992993	7.86282e-06	Negative
PGAP1	protein_coding	uc003jox.1	ncRNA	0.990903	1.50881e-05	Positive
PGAP1	protein_coding	linc-PAX8-3	ncRNA	0.984898	5.33947e-05	Positive
SCFD1	protein_coding	AC017002.4	ncRNA	-0.990602	1.63612e-05	Negative
uc003wwa.2	ncRNA	NFKBIZ	protein_coding	0.985477	4.84431e-05	Positive
uc003wwa.2	ncRNA	AOC3	protein_coding	-0.980354	0.000102811	Negative
DQ786204	ncRNA	NSUN6	protein_coding	0.99371	6.00547e-06	Positive
uc004ack.2	ncRNA	AOC3	protein_coding	-0.990156	1.83711e-05	Negative
NPAT	protein_coding	linc-ANKRD20A1-8	ncRNA	0.985529	4.80117e-05	Positive
NPAT	protein_coding	uc003jox.1	ncRNA	0.98125	9.1528e-05	Positive
CR592158	ncRNA	NR4A2	protein_coding	0.98323	6.93261e-05	Positive
CR592158	ncRNA	NR4A3	protein_coding	0.988586	2.65704e-05	Positive
CR592158	ncRNA	STXBP3	protein_coding	0.993079	7.62442e-06	Positive
CR592158	ncRNA	CPAMD8	protein_coding	-0.988843	2.5104e-05	Negative
CR592158	ncRNA	DNAJB14	protein_coding	0.980424	0.000101911	Positive
CR592158	ncRNA	LYRM7	protein_coding	0.992115	1.05593e-05	Positive
CR592158	ncRNA	RB1CC1	protein_coding	0.986935	3.72121e-05	Positive
CR592158	ncRNA	NEMF	protein_coding	0.99646	1.42945e-06	Positive
CR592158	ncRNA	USP16	protein_coding	0.991346	1.3319e-05	Positive
CR592158	ncRNA	JMJD1C	protein_coding	0.987531	3.31195e-05	Positive
CR592158	ncRNA	SIK1	protein_coding	0.985763	4.61e-05	Positive
CR592158	ncRNA	POLK	protein_coding	0.998507	1.6537e-07	Positive
CR592158	ncRNA	IFT74	protein_coding	0.989708	2.05236e-05	Positive
CR592158	ncRNA	GCC2	protein_coding	0.980451	0.000101561	Positive
CR592158	ncRNA	SCFD1	protein_coding	0.991525	1.26424e-05	Positive
CR592158	ncRNA	CIR1	protein_coding	0.993223	7.23437e-06	Positive
RGPD6	protein_coding	linc_luo_1161	ncRNA	0.990532	1.66664e-05	Positive
RGPD6	protein_coding	linc_luo_795	ncRNA	0.987312	3.45893e-05	Positive
RGPD6	protein_coding	linc-AMPD2	ncRNA	0.984817	5.41139e-05	Positive
MTPN	protein_coding	linc-ANKRD20A1-8	ncRNA	0.988036	2.98799e-05	Positive
BC038203	ncRNA	TAS2R20	protein_coding	0.980708	9.82646e-05	Positive
BTG3	protein_coding	linc_luo_1157	ncRNA	-0.987253	3.49921e-05	Negative
UGCG	protein_coding	linc-PEX13	ncRNA	0.983337	6.82248e-05	Positive
TIA1	protein_coding	linc-RANBP3L-5	ncRNA	0.991514	1.26828e-05	Positive
ALDH1B1	protein_coding	AK021606	ncRNA	-0.989536	2.13921e-05	Negative
AK094210	ncRNA	KIAA1033	protein_coding	-0.981493	8.86041e-05	Negative
AK094210	ncRNA	KCTD9	protein_coding	-0.985039	5.21613e-05	Negative
AK094210	ncRNA	SNX7	protein_coding	-0.988993	2.42695e-05	Negative
AK094210	ncRNA	APCDD1	protein_coding	0.984408	5.78211e-05	Positive
AK094210	ncRNA	NTN1	protein_coding	0.989942	1.93812e-05	Positive
AK094210	ncRNA	IL31RA	protein_coding	0.98214	8.10934e-05	Positive
linc_luo_1759	ncRNA	KIAA1033	protein_coding	0.981497	8.85657e-05	Positive
linc_luo_1759	ncRNA	CPAMD8	protein_coding	-0.984996	5.25392e-05	Negative
linc_luo_1759	ncRNA	RB1CC1	protein_coding	0.981387	8.9875e-05	Positive
linc_luo_1759	ncRNA	SNX7	protein_coding	0.983093	7.07464e-05	Positive
linc_luo_1759	ncRNA	GCC2	protein_coding	0.981187	9.23059e-05	Positive
ARRDC3	protein_coding	BC029474	ncRNA	0.993323	6.97308e-06	Positive
TMF1	protein_coding	CR592158	ncRNA	0.981687	8.63155e-05	Positive
AJ227894	ncRNA	NDUFB2	protein_coding	0.982881	7.29705e-05	Positive
BVES	protein_coding	linc-LBX1-2	ncRNA	0.984081	6.08885e-05	Positive
PAXBP1	protein_coding	RP11-834C11.10	ncRNA	-0.994013	5.30904e-06	Negative
HPD	protein_coding	linc-REXO1L1	ncRNA	0.993014	7.80435e-06	Positive
linc-KCP	ncRNA	ASB2	protein_coding	0.993594	6.28609e-06	Positive
linc-KCP	ncRNA	WISP2	protein_coding	0.983111	7.05583e-05	Positive
linc-KCP	ncRNA	RASGEF1B	protein_coding	-0.981936	8.34235e-05	Negative
linc-KCP	ncRNA	CLOCK	protein_coding	-0.990113	1.8569e-05	Negative
AC010745.2	ncRNA	C9orf72	protein_coding	-0.981594	8.74081e-05	Negative
RP1-213J1P__B.2	ncRNA	ZNF600	protein_coding	-0.986869	3.76807e-05	Negative
RP1-213J1P__B.2	ncRNA	BIVM	protein_coding	-0.98873	2.57406e-05	Negative
RP1-213J1P__B.2	ncRNA	ITM2C	protein_coding	0.982564	7.63882e-05	Positive
ZRANB2	protein_coding	AC017002.4	ncRNA	-0.983747	6.41215e-05	Negative
RANBP2	protein_coding	uc003jox.1	ncRNA	0.984682	5.53235e-05	Positive
RANBP2	protein_coding	linc-PAX8-3	ncRNA	0.98533	4.96757e-05	Positive
TIMP4	protein_coding	uc003jox.1	ncRNA	-0.994437	4.41966e-06	Negative
TIMP4	protein_coding	linc-PAX8-3	ncRNA	-0.993545	6.4071e-06	Negative
CCDC14	protein_coding	linc-JAK1-1	ncRNA	0.980527	0.000100571	Positive
uc002xjm.2	ncRNA	CAPRIN2	protein_coding	0.988856	2.50288e-05	Positive
uc002xjm.2	ncRNA	TIA1	protein_coding	0.982929	7.24653e-05	Positive
uc002xjm.2	ncRNA	PAXBP1	protein_coding	0.981939	8.33838e-05	Positive
linc_luo_930	ncRNA	NSUN6	protein_coding	0.98003	0.000107086	Positive
linc_luo_930	ncRNA	ALDH1B1	protein_coding	-0.989132	2.35101e-05	Negative
CR590573	ncRNA	CCDC14	protein_coding	0.982163	8.08301e-05	Positive
linc_luo_868	ncRNA	RASL12	protein_coding	-0.984744	5.4762e-05	Negative
PIBF1	protein_coding	AC017002.4	ncRNA	-0.990661	1.61082e-05	Negative
PIBF1	protein_coding	linc-JAK1-1	ncRNA	0.980611	9.94943e-05	Positive
PIBF1	protein_coding	RP11-586L23.1	ncRNA	-0.981078	9.3636e-05	Negative
AK026778	ncRNA	AOC3	protein_coding	-0.982156	8.09109e-05	Negative
CREB5	protein_coding	BC042084	ncRNA	0.980795	9.7167e-05	Positive
SLC35F5	protein_coding	linc-PAX8-3	ncRNA	0.990238	1.79881e-05	Positive
uc001iqe.2	ncRNA	CHD1	protein_coding	0.98236	7.86252e-05	Positive
uc001iqe.2	ncRNA	PRMT9	protein_coding	0.991285	1.35553e-05	Positive
uc001iqe.2	ncRNA	DNAJB14	protein_coding	0.984353	5.83274e-05	Positive
uc001iqe.2	ncRNA	CHMP1B	protein_coding	0.985976	4.44019e-05	Positive
uc001iqe.2	ncRNA	JMJD1C	protein_coding	0.980447	0.000101611	Positive
uc001iqe.2	ncRNA	SLC2A3	protein_coding	0.991402	1.31051e-05	Positive
uc001iqe.2	ncRNA	IER3	protein_coding	0.989478	2.16891e-05	Positive
uc001iqe.2	ncRNA	MOSPD2	protein_coding	0.988329	2.80873e-05	Positive
ENPEP	protein_coding	linc-C14orf102-1	ncRNA	-0.981421	8.94642e-05	Negative
ENPEP	protein_coding	uc003jox.1	ncRNA	0.985353	4.94797e-05	Positive
ENPEP	protein_coding	linc-PAX8-3	ncRNA	0.984828	5.40165e-05	Positive
ENPEP	protein_coding	AK094210	ncRNA	-0.98306	7.10848e-05	Negative
DPYD-IT1	ncRNA	CAPN7	protein_coding	0.987253	3.49958e-05	Positive
NR_024415	ncRNA	MAP1B	protein_coding	-0.991354	1.32897e-05	Negative
NR_024415	ncRNA	TMOD2	protein_coding	0.981953	8.32221e-05	Positive
linc_luo_1223	ncRNA	TIA1	protein_coding	0.983228	6.93452e-05	Positive
ANKRD12	protein_coding	BC029474	ncRNA	0.984169	6.00519e-05	Positive
ANKRD12	protein_coding	linc-C14orf102-1	ncRNA	-0.983467	6.69078e-05	Negative
ANKRD12	protein_coding	uc001iqe.2	ncRNA	0.984494	5.70291e-05	Positive
BC047912	ncRNA	BTG2	protein_coding	0.993303	7.02354e-06	Positive
CHRM4	protein_coding	linc-TCERG1L-1	ncRNA	0.985251	5.03372e-05	Positive
CHRM4	protein_coding	linc-ARHGAP11B-2	ncRNA	0.983912	6.25156e-05	Positive
CHRM4	protein_coding	AC092171.4	ncRNA	0.987391	3.40549e-05	Positive
uc003jka.1	ncRNA	KIAA1033	protein_coding	0.98113	9.29999e-05	Positive
uc003jka.1	ncRNA	CPAMD8	protein_coding	-0.980846	9.65241e-05	Negative
uc003jka.1	ncRNA	RGS16	protein_coding	0.992994	7.86082e-06	Positive
uc003jka.1	ncRNA	ST6GALNAC5	protein_coding	0.985428	4.88494e-05	Positive
uc003jka.1	ncRNA	ZNF331	protein_coding	0.987866	3.0946e-05	Positive
uc003jka.1	ncRNA	GCC2	protein_coding	0.990591	1.64107e-05	Positive
uc003jka.1	ncRNA	PGAP1	protein_coding	0.990007	1.9069e-05	Positive
uc003jka.1	ncRNA	CCDC186	protein_coding	0.984008	6.1581e-05	Positive
uc003jka.1	ncRNA	NPAT	protein_coding	0.982166	8.08019e-05	Positive
uc003jka.1	ncRNA	RANBP2	protein_coding	0.983695	6.4637e-05	Positive
uc003jka.1	ncRNA	TIMP4	protein_coding	-0.990912	1.50472e-05	Negative
CLEC10A	protein_coding	linc-TCERG1L-1	ncRNA	0.985539	4.79235e-05	Positive
CLEC10A	protein_coding	X54707	ncRNA	0.996669	1.22739e-06	Positive
CLEC10A	protein_coding	AC017002.4	ncRNA	0.981153	9.27193e-05	Positive
CLEC10A	protein_coding	CR592158	ncRNA	-0.981547	8.79709e-05	Negative
AF086041	ncRNA	CAPRIN2	protein_coding	0.98265	7.54473e-05	Positive
AF086041	ncRNA	NDUFB2	protein_coding	0.990255	1.79112e-05	Positive
AF086041	ncRNA	NSUN6	protein_coding	0.993147	7.44086e-06	Positive
ANKRD36C	protein_coding	LINC00266-1	ncRNA	0.982338	7.88709e-05	Positive
ANKRD36C	protein_coding	AK091489	ncRNA	0.987051	3.63931e-05	Positive
ANKRD36C	protein_coding	DQ786204	ncRNA	0.980852	9.64478e-05	Positive
ANKRD36C	protein_coding	AJ227894	ncRNA	0.980045	0.000106882	Positive
FNBP4	protein_coding	RP11-259O2.3	ncRNA	0.980608	9.95339e-05	Positive
FNBP4	protein_coding	linc-RANBP3L-5	ncRNA	0.987648	3.23555e-05	Positive
FNBP4	protein_coding	uc002xjm.2	ncRNA	0.993195	7.30973e-06	Positive
PLK2	protein_coding	AF088050	ncRNA	0.98143	8.93628e-05	Positive
SKIL	protein_coding	uc003jka.1	ncRNA	0.988855	2.50358e-05	Positive
ARL5B	protein_coding	linc_luo_1704	ncRNA	0.9804	0.000102216	Positive
LMBRD2	protein_coding	uc003jox.1	ncRNA	0.982902	7.27473e-05	Positive
LMBRD2	protein_coding	linc-PAX8-3	ncRNA	0.985716	4.64771e-05	Positive
LMBRD2	protein_coding	uc003jka.1	ncRNA	0.997527	5.8308e-07	Positive
RPE	protein_coding	U54734	ncRNA	0.990209	1.81249e-05	Positive
RPE	protein_coding	CR590573	ncRNA	0.984825	5.40445e-05	Positive
RPE	protein_coding	AF086041	ncRNA	0.982687	7.50535e-05	Positive
linc-CCDC146-3	ncRNA	NDUFB2	protein_coding	0.991522	1.2655e-05	Positive
linc-CCDC146-3	ncRNA	ZNF638	protein_coding	0.981198	9.2169e-05	Positive
SLC33A1	protein_coding	BC041991	ncRNA	0.983652	6.50564e-05	Positive
ANKRD36	protein_coding	RP11-259O2.3	ncRNA	0.983442	6.71562e-05	Positive
ANKRD36	protein_coding	linc-RANBP3L-5	ncRNA	0.997312	7.18213e-07	Positive
ANKRD36	protein_coding	DQ786204	ncRNA	0.983906	6.2567e-05	Positive
ANKRD36	protein_coding	uc002xjm.2	ncRNA	0.985456	4.86127e-05	Positive
ANKRD36	protein_coding	AF085868	ncRNA	0.983454	6.70371e-05	Positive
ANKRD36	protein_coding	MIR548O2	ncRNA	0.991885	1.13442e-05	Positive
ANKRD36	protein_coding	MIR548AA2	ncRNA	0.981537	8.8082e-05	Positive
CR627153	ncRNA	ANKRD36C	protein_coding	0.987051	3.63969e-05	Positive
uc003pju.1	ncRNA	KIAA1033	protein_coding	0.989365	2.22745e-05	Positive
uc003pju.1	ncRNA	CPAMD8	protein_coding	-0.983584	6.5738e-05	Negative
uc003pju.1	ncRNA	DUSP27	protein_coding	-0.989098	2.36951e-05	Negative
uc003pju.1	ncRNA	RB1CC1	protein_coding	0.980025	0.00010716	Positive
uc003pju.1	ncRNA	ST6GALNAC5	protein_coding	0.984973	5.27349e-05	Positive
uc003pju.1	ncRNA	CYP4B1	protein_coding	-0.986431	4.08922e-05	Negative
uc003pju.1	ncRNA	APCDD1	protein_coding	-0.981164	9.25828e-05	Negative
uc003pju.1	ncRNA	GCC2	protein_coding	0.986409	4.10562e-05	Positive
uc003pju.1	ncRNA	PHTF2	protein_coding	0.980238	0.000104326	Positive
linc-CXorf49B-2	ncRNA	TTLL11	protein_coding	0.985766	4.60774e-05	Positive
ANKRD44-IT1	ncRNA	FOS	protein_coding	0.987143	3.57496e-05	Positive
SAT1	protein_coding	RP11-554D13.1	ncRNA	0.987075	3.62225e-05	Positive
SAT1	protein_coding	uc011cts.1	ncRNA	0.993414	6.7367e-06	Positive
SAT1	protein_coding	MIR548AA2	ncRNA	0.987891	3.07908e-05	Positive
RGPD8	protein_coding	RP5-826L7.1	ncRNA	0.98161	8.72179e-05	Positive
RGPD8	protein_coding	linc-HNF1B-4	ncRNA	0.985996	4.42393e-05	Positive
RGPD8	protein_coding	MIR548D1	ncRNA	0.989069	2.38547e-05	Positive
RGPD8	protein_coding	linc-AMPD2	ncRNA	0.981408	8.9623e-05	Positive
RGPD8	protein_coding	CR627153	ncRNA	0.980429	0.000101845	Positive
SLC2A3	protein_coding	uc001iqe.2	ncRNA	0.980723	9.80704e-05	Positive
SLC2A3	protein_coding	uc003jka.1	ncRNA	0.981914	8.3676e-05	Positive
LOC100506123	ncRNA	ARID5A	protein_coding	-0.990311	1.76562e-05	Negative
LOC100506123	ncRNA	ALDH1B1	protein_coding	-0.988451	2.73607e-05	Negative
LOC100506123	ncRNA	TMEM30B	protein_coding	-0.983391	6.76747e-05	Negative
BIRC2	protein_coding	linc-AKT3-4	ncRNA	-0.986798	3.8194e-05	Negative
uc001elb.3	ncRNA	AOC3	protein_coding	-0.987708	3.19629e-05	Negative
uc001elb.3	ncRNA	ANKRD36	protein_coding	0.987215	3.5255e-05	Positive
RNF217	protein_coding	uc003jox.1	ncRNA	0.986711	3.88238e-05	Positive
RNF217	protein_coding	linc-PAX8-3	ncRNA	0.990506	1.67826e-05	Positive
RNF217	protein_coding	uc003jka.1	ncRNA	0.991735	1.18758e-05	Positive
SLC36A4	protein_coding	X92108	ncRNA	0.98634	4.15779e-05	Positive
SMCHD1	protein_coding	linc_luo_1013	ncRNA	0.991212	1.38396e-05	Positive
SMCHD1	protein_coding	linc-LBX1-2	ncRNA	-0.982988	7.18429e-05	Negative
SMCHD1	protein_coding	linc-TEKT4-1	ncRNA	0.986384	4.12504e-05	Positive
SMCHD1	protein_coding	CR625890	ncRNA	0.997412	6.53509e-07	Positive
linc-PPWD1	ncRNA	ADRA2C	protein_coding	0.984021	6.14604e-05	Positive
linc-PPWD1	ncRNA	IL1B	protein_coding	-0.980143	0.000105589	Negative
linc-PPWD1	ncRNA	ENPEP	protein_coding	-0.983832	6.32905e-05	Negative
linc-PPWD1	ncRNA	DDX60	protein_coding	-0.997649	5.14179e-07	Negative
linc-PPWD1	ncRNA	SP100	protein_coding	-0.991126	1.4181e-05	Negative
MIR3117	ncRNA	MICU3	protein_coding	0.984722	5.49653e-05	Positive
KIAA1107	protein_coding	BC029474	ncRNA	0.983142	7.02294e-05	Positive
TTN	protein_coding	AK026828	ncRNA	0.980143	0.000105584	Positive
linc-BPY2B-4	ncRNA	ALG13	protein_coding	0.988634	2.629e-05	Positive
linc-BPY2B-4	ncRNA	RBM26	protein_coding	0.980034	0.000107039	Positive
linc-BPY2B-4	ncRNA	THOC1	protein_coding	0.987267	3.49016e-05	Positive
linc-BPY2B-4	ncRNA	DYNC2H1	protein_coding	0.982281	7.95075e-05	Positive
linc-BPY2B-4	ncRNA	HLA-C	protein_coding	0.983363	6.796e-05	Positive
linc-BPY2B-4	ncRNA	RASA2	protein_coding	0.982539	7.6661e-05	Positive
linc-BPY2B-4	ncRNA	NSUN6	protein_coding	0.981946	8.33084e-05	Positive
linc-BPY2B-4	ncRNA	TIA1	protein_coding	0.982667	7.52654e-05	Positive
BROX	protein_coding	linc_luo_1704	ncRNA	0.981045	9.40449e-05	Positive
ANKRD10-IT1	ncRNA	THOC1	protein_coding	0.982694	7.4975e-05	Positive
ANKRD10-IT1	ncRNA	TIA1	protein_coding	0.989649	2.08184e-05	Positive
ATP1B3	protein_coding	BC029474	ncRNA	0.980244	0.000104256	Positive
ATP1B3	protein_coding	CR592158	ncRNA	0.982398	7.82057e-05	Positive
HSPB6	protein_coding	RP11-554D13.1	ncRNA	-0.983001	7.17082e-05	Negative
HSPB6	protein_coding	uc011cts.1	ncRNA	-0.983293	6.86743e-05	Negative
RAP2A	protein_coding	uc003jka.1	ncRNA	0.985125	5.14193e-05	Positive
SGK1	protein_coding	linc-TOR1AIP2-3	ncRNA	-0.986299	4.18961e-05	Negative
SGK1	protein_coding	uc003pju.1	ncRNA	0.994833	3.67651e-06	Positive
linc-FCGR1A-3	ncRNA	TIA1	protein_coding	0.989981	1.91924e-05	Positive
linc-FCGR1A-3	ncRNA	FNBP4	protein_coding	0.987094	3.60907e-05	Positive
linc-FCGR1A-3	ncRNA	SLC33A1	protein_coding	0.980545	0.000100339	Positive
uc003qmb.2	ncRNA	CD58	protein_coding	0.982813	7.36998e-05	Positive
AK092622	ncRNA	ANKRD36C	protein_coding	0.986333	4.16322e-05	Positive
uc001uoa.1	ncRNA	NPAT	protein_coding	0.987568	3.28788e-05	Positive
uc001uoa.1	ncRNA	DDX60	protein_coding	0.98623	4.24228e-05	Positive
uc001uoa.1	ncRNA	PIGK	protein_coding	0.990917	1.50275e-05	Positive
CEP290	protein_coding	linc-TOR1AIP2-3	ncRNA	-0.981931	8.34825e-05	Negative
CEP290	protein_coding	uc003jox.1	ncRNA	0.989845	1.98513e-05	Positive
CEP290	protein_coding	linc-PAX8-3	ncRNA	0.991029	1.45689e-05	Positive
CEP290	protein_coding	uc003jka.1	ncRNA	0.980554	0.000100225	Positive
CEP290	protein_coding	uc003pju.1	ncRNA	0.996361	1.53104e-06	Positive
ANKRD36B	protein_coding	linc-RANBP3L-5	ncRNA	0.992928	8.0488e-06	Positive
ANKRD36B	protein_coding	AF085868	ncRNA	0.981618	8.71306e-05	Positive
ANKRD36B	protein_coding	MIR548O2	ncRNA	0.980827	9.67561e-05	Positive
ANKRD36B	protein_coding	linc-FCGR1A-3	ncRNA	0.983173	6.99082e-05	Positive
linc-PLD1-2	ncRNA	VPREB3	protein_coding	-0.981284	9.11264e-05	Negative
linc-PLD1-2	ncRNA	NFIL3	protein_coding	0.991705	1.19829e-05	Positive
uc003hsl.1	ncRNA	TFPI	protein_coding	0.985601	4.74166e-05	Positive
uc003hsl.1	ncRNA	SESN3	protein_coding	0.982667	7.52686e-05	Positive
uc003hsl.1	ncRNA	ARHGEF6	protein_coding	0.986952	3.70903e-05	Positive
TTC14	protein_coding	linc_luo_795	ncRNA	0.986693	3.89529e-05	Positive
TTC14	protein_coding	BC041991	ncRNA	0.984321	5.86218e-05	Positive
TTC14	protein_coding	AK026828	ncRNA	0.990997	1.46999e-05	Positive
TTC14	protein_coding	linc-BPY2B-4	ncRNA	0.992653	8.85291e-06	Positive
TTC14	protein_coding	ANKRD10-IT1	ncRNA	0.985919	4.48467e-05	Positive
MYOCD	protein_coding	AK094210	ncRNA	0.988485	2.71597e-05	Positive
uc010fnw.1	ncRNA	SLC35F5	protein_coding	0.985099	5.16445e-05	Positive
uc010fnw.1	ncRNA	ENPEP	protein_coding	0.987864	3.09604e-05	Positive
uc010fnw.1	ncRNA	SP100	protein_coding	0.980024	0.000107169	Positive
MYOC	protein_coding	CR613639	ncRNA	-0.98923	2.29852e-05	Negative
RP11-1018N14.3	ncRNA	TIA1	protein_coding	0.980319	0.000103265	Positive
HLA-DQA1	protein_coding	AJ227894	ncRNA	0.983058	7.11091e-05	Positive
HLA-DQA1	protein_coding	linc-CCDC146-3	ncRNA	0.986378	4.12914e-05	Positive
HLA-DQA1	protein_coding	RP11-1018N14.3	ncRNA	0.981501	8.8511e-05	Positive
BC033713	ncRNA	PCF11	protein_coding	0.987623	3.25161e-05	Positive
BC033713	ncRNA	MFHAS1	protein_coding	0.982951	7.22317e-05	Positive
BC033713	ncRNA	EGR3	protein_coding	0.9821	8.15417e-05	Positive
BC033713	ncRNA	ZNF226	protein_coding	0.98091	9.57192e-05	Positive
SELENBP1	protein_coding	linc-TOR1AIP2-3	ncRNA	0.987467	3.35507e-05	Positive
SELENBP1	protein_coding	uc003jox.1	ncRNA	-0.985278	5.01093e-05	Negative
SELENBP1	protein_coding	AK094210	ncRNA	0.993117	7.52238e-06	Positive
SELENBP1	protein_coding	linc_luo_1759	ncRNA	-0.986176	4.28392e-05	Negative
SELENBP1	protein_coding	uc003pju.1	ncRNA	-0.990431	1.71163e-05	Negative
LINC00342	ncRNA	THOC1	protein_coding	0.985091	5.17089e-05	Positive
LINC00342	ncRNA	TTC14	protein_coding	0.99086	1.52648e-05	Positive
ACTC1	protein_coding	CR596712	ncRNA	0.992323	9.87845e-06	Positive
CECR7	ncRNA	FLNC	protein_coding	0.98108	9.36103e-05	Positive
BX537573	ncRNA	ZFAND5	protein_coding	0.981769	8.53547e-05	Positive
BX537573	ncRNA	IER3	protein_coding	0.986172	4.28636e-05	Positive
DDX58	protein_coding	linc-PPWD1	ncRNA	-0.984191	5.98454e-05	Negative
S1PR3	protein_coding	linc-AKT3-4	ncRNA	0.984663	5.5491e-05	Positive
S1PR3	protein_coding	AC010745.2	ncRNA	0.985589	4.7514e-05	Positive
MFAP4	protein_coding	linc_luo_1183	ncRNA	-0.980198	0.000104858	Negative
MFAP4	protein_coding	CR609342	ncRNA	-0.99066	1.61136e-05	Negative
MFAP4	protein_coding	linc_luo_1013	ncRNA	-0.985085	5.17614e-05	Negative
MFAP4	protein_coding	MIR548D1	ncRNA	-0.986759	3.84745e-05	Negative
MFAP4	protein_coding	uc003wwa.2	ncRNA	-0.987249	3.50211e-05	Negative
CNN1	protein_coding	KB-1930G5.3	ncRNA	0.987023	3.65872e-05	Positive
LRRK2	protein_coding	X54707	ncRNA	-0.98308	7.088e-05	Negative
SLC5A3	protein_coding	linc-TOR1AIP2-3	ncRNA	-0.980522	0.000100634	Negative
SLC5A3	protein_coding	X92108	ncRNA	0.984291	5.89032e-05	Positive
SLC5A3	protein_coding	LINC00310	ncRNA	0.988884	2.48755e-05	Positive
INSIG2	protein_coding	uc003jka.1	ncRNA	0.980276	0.000103829	Positive
FAR1	protein_coding	X54707	ncRNA	-0.982283	7.94921e-05	Negative
FAR1	protein_coding	linc-TOR1AIP2-3	ncRNA	-0.98009	0.000106284	Negative
linc_luo_771	ncRNA	PRMT9	protein_coding	0.981848	8.44362e-05	Positive
linc_luo_771	ncRNA	CHMP1B	protein_coding	0.9898	2.00721e-05	Positive
linc_luo_771	ncRNA	FOPNL	protein_coding	0.985478	4.84327e-05	Positive
linc_luo_771	ncRNA	SLC2A3	protein_coding	0.9857	4.66077e-05	Positive
linc_luo_771	ncRNA	CCDC186	protein_coding	0.987256	3.49742e-05	Positive
linc_luo_771	ncRNA	MOSPD2	protein_coding	0.986188	4.27416e-05	Positive
linc_luo_771	ncRNA	TOB1	protein_coding	0.984226	5.95171e-05	Positive
SLC20A1	protein_coding	linc-C14orf102-1	ncRNA	-0.992862	8.23703e-06	Negative
CKAP2	protein_coding	linc-HSF2-1	ncRNA	0.996402	1.48824e-06	Positive
linc-SPRY3-4	ncRNA	TMF1	protein_coding	-0.982125	8.12661e-05	Negative
HLA-DRB4	protein_coding	LINC00960	ncRNA	0.98563	4.71816e-05	Positive
SLC22A3	protein_coding	linc-PPWD1	ncRNA	0.981873	8.41437e-05	Positive
USP15	protein_coding	linc-EEPD1-3	ncRNA	0.998729	1.10646e-07	Positive
ADAMTS4	protein_coding	linc_luo_1076	ncRNA	0.992692	8.73489e-06	Positive
ADAMTS4	protein_coding	uc003jox.1	ncRNA	0.980335	0.000103057	Positive
TFPI	protein_coding	uc001uoa.1	ncRNA	0.984973	5.27375e-05	Positive
BC026277	ncRNA	CLEC2D	protein_coding	0.981343	9.04034e-05	Positive
GADD45B	protein_coding	uc011bfh.1	ncRNA	0.990768	1.56497e-05	Positive
KIAA1551	protein_coding	linc-C14orf102-1	ncRNA	-0.984143	6.02984e-05	Negative
AK126477	ncRNA	SAT1	protein_coding	0.981088	9.35142e-05	Positive
linc-FAHD2B-5	ncRNA	NSUN6	protein_coding	0.984166	6.00767e-05	Positive
linc-FAHD2B-5	ncRNA	ALDH1B1	protein_coding	-0.993539	6.42321e-06	Negative
CREBZF	protein_coding	RP11-834C11.10	ncRNA	-0.98074	9.78577e-05	Negative
CREBZF	protein_coding	RP11-1018N14.3	ncRNA	0.986081	4.35768e-05	Positive
CREBZF	protein_coding	AK130482	ncRNA	0.987324	3.45079e-05	Positive
CAST	protein_coding	AF085868	ncRNA	0.985363	4.93915e-05	Positive
AC023128.1	ncRNA	LCORL	protein_coding	0.981055	9.39198e-05	Positive
PANK2	protein_coding	AX721062	ncRNA	0.980258	0.000104074	Positive
PANK2	protein_coding	CR590573	ncRNA	0.98768	3.21476e-05	Positive
PANK2	protein_coding	AK026828	ncRNA	0.986386	4.12301e-05	Positive
PANK2	protein_coding	linc-BPY2B-4	ncRNA	0.984991	5.25782e-05	Positive
NRARP	protein_coding	linc-GRB14	ncRNA	0.983885	6.27686e-05	Positive
NRARP	protein_coding	BC033713	ncRNA	0.981071	9.37293e-05	Positive
RNF149	protein_coding	linc-PLD5-4	ncRNA	0.981753	8.55382e-05	Positive
RNF149	protein_coding	linc-SLC39A10-10	ncRNA	0.98493	5.31194e-05	Positive
C1orf95	protein_coding	linc-PAX8-3	ncRNA	-0.987069	3.62688e-05	Negative
C1orf95	protein_coding	linc-PPWD1	ncRNA	0.983309	6.85109e-05	Positive
C1orf95	protein_coding	uc010fnw.1	ncRNA	-0.983636	6.52196e-05	Negative
LOC100507577	ncRNA	ANKRD36C	protein_coding	0.98317	6.99465e-05	Positive
linc_luo_2019	ncRNA	ANKRD36C	protein_coding	0.980418	0.000101979	Positive
linc_luo_2019	ncRNA	TNFRSF12A	protein_coding	-0.984586	5.61922e-05	Negative
AF070595	ncRNA	TMOD2	protein_coding	0.98483	5.40006e-05	Positive
DMTF1	protein_coding	linc-RANBP3L-5	ncRNA	0.988974	2.43749e-05	Positive
DMTF1	protein_coding	AK021887	ncRNA	0.999868	3.84209e-10	Positive
DMTF1	protein_coding	MIR548O2	ncRNA	0.984971	5.27574e-05	Positive
DMTF1	protein_coding	RP11-1018N14.3	ncRNA	0.993237	7.1982e-06	Positive
ZMAT1	protein_coding	linc_luo_795	ncRNA	0.989394	2.21251e-05	Positive
ZMAT1	protein_coding	BC041991	ncRNA	0.984748	5.47327e-05	Positive
ZMAT1	protein_coding	AK026828	ncRNA	0.987351	3.43289e-05	Positive
ZMAT1	protein_coding	linc-BPY2B-4	ncRNA	0.991935	1.11708e-05	Positive
ZMAT1	protein_coding	ANKRD10-IT1	ncRNA	0.984789	5.43662e-05	Positive
ZMAT1	protein_coding	LINC00342	ncRNA	0.990488	1.68621e-05	Positive
LOC101928020	ncRNA	TIA1	protein_coding	0.993278	7.08974e-06	Positive
LOC101928020	ncRNA	ANKRD36B	protein_coding	0.988028	2.99289e-05	Positive
LOC101928020	ncRNA	TTC14	protein_coding	0.980222	0.000104542	Positive
LOC101928020	ncRNA	PANK2	protein_coding	0.981066	9.37844e-05	Positive
LOC101928020	ncRNA	DMTF1	protein_coding	0.981878	8.40935e-05	Positive
EPPK1	protein_coding	linc-C14orf102-1	ncRNA	0.991565	1.24956e-05	Positive
EPPK1	protein_coding	CR596712	ncRNA	0.986654	3.92406e-05	Positive
ECM2	protein_coding	uc003jox.1	ncRNA	0.981897	8.3865e-05	Positive
ECM2	protein_coding	uc003jka.1	ncRNA	0.990751	1.57211e-05	Positive
PPP1R1A	protein_coding	uc003jox.1	ncRNA	-0.984964	5.28189e-05	Negative
PPP1R1A	protein_coding	linc-PAX8-3	ncRNA	-0.990723	1.58405e-05	Negative
PPP1R1A	protein_coding	uc003jka.1	ncRNA	-0.988869	2.49577e-05	Negative
THAP2	protein_coding	linc-ANKRD20A1-8	ncRNA	0.984477	5.71849e-05	Positive
linc-ARID1B-2	ncRNA	ANKRD36	protein_coding	0.985083	5.17846e-05	Positive
linc-ARID1B-2	ncRNA	ANKRD36B	protein_coding	0.98167	8.65178e-05	Positive
linc-ARID1B-2	ncRNA	CAST	protein_coding	0.986582	3.97722e-05	Positive
linc-ARID1B-2	ncRNA	DMTF1	protein_coding	0.98555	4.78394e-05	Positive
linc-ARID1B-2	ncRNA	TAS2R30	protein_coding	0.992286	9.9964e-06	Positive
ZNF704	protein_coding	linc-PAX8-3	ncRNA	0.980604	9.95933e-05	Positive
ZNF704	protein_coding	linc_luo_1759	ncRNA	0.985729	4.63728e-05	Positive
ZNF704	protein_coding	uc003jka.1	ncRNA	0.991365	1.3247e-05	Positive
ZNF704	protein_coding	linc-HSF2-1	ncRNA	0.983392	6.76675e-05	Positive
CR749491	ncRNA	TTN	protein_coding	0.984039	6.1292e-05	Positive
CR749491	ncRNA	PANK2	protein_coding	0.984093	6.0775e-05	Positive
C1orf110	protein_coding	BC029474	ncRNA	0.991841	1.14969e-05	Positive
C1orf110	protein_coding	uc001iqe.2	ncRNA	0.984238	5.94051e-05	Positive
TAS2R30	protein_coding	linc-VEZF1	ncRNA	0.987142	3.57579e-05	Positive
NAIP	protein_coding	AK021606	ncRNA	0.981437	8.92828e-05	Positive
SYAP1	protein_coding	linc-ANKRD20A1-8	ncRNA	0.986347	4.15255e-05	Positive
UTRN	protein_coding	linc-C14orf102-1	ncRNA	-0.990915	1.50383e-05	Negative
linc_luo_95	ncRNA	ZNF280D	protein_coding	0.982754	7.43284e-05	Positive
linc_luo_95	ncRNA	THOC1	protein_coding	0.981043	9.40648e-05	Positive
linc_luo_95	ncRNA	PPIP5K2	protein_coding	0.983656	6.50185e-05	Positive
linc_luo_95	ncRNA	ZFYVE16	protein_coding	0.981975	8.2978e-05	Positive
linc_luo_95	ncRNA	ZRANB2	protein_coding	0.990648	1.61624e-05	Positive
linc_luo_95	ncRNA	PIBF1	protein_coding	0.980316	0.000103305	Positive
LINC00478	ncRNA	ITM2C	protein_coding	-0.98024	0.0001043	Negative
LINC00478	ncRNA	PYGB	protein_coding	-0.983015	7.15618e-05	Negative
LINC00478	ncRNA	CNN1	protein_coding	-0.981369	9.00952e-05	Negative
PDE3A	protein_coding	uc002ujk.2	ncRNA	0.982573	7.62822e-05	Positive
PDE3A	protein_coding	linc_luo_1704	ncRNA	0.983057	7.11222e-05	Positive
AK058157	ncRNA	CEP95	protein_coding	0.981683	8.63574e-05	Positive
SAMSN1	protein_coding	linc-C14orf102-1	ncRNA	-0.986385	4.12391e-05	Negative
SAMSN1	protein_coding	linc-PPWD1	ncRNA	-0.983346	6.81312e-05	Negative
LINC01212	ncRNA	BIRC2	protein_coding	-0.981517	8.83173e-05	Negative
NABP1	protein_coding	CR609342	ncRNA	0.9815	8.85295e-05	Positive
NABP1	protein_coding	NR_024415	ncRNA	0.980631	9.9247e-05	Positive
linc-GPR141-2	ncRNA	CAPN7	protein_coding	0.990664	1.60964e-05	Positive
linc-GPR141-2	ncRNA	HLA-C	protein_coding	0.980296	0.000103566	Positive
linc-GPR141-2	ncRNA	NDUFB2	protein_coding	0.98355	6.60739e-05	Positive
linc-GPR141-2	ncRNA	ZNF638	protein_coding	0.987983	3.02102e-05	Positive
linc-GPR141-2	ncRNA	PAXBP1	protein_coding	0.986166	4.29161e-05	Positive
linc-GPR141-2	ncRNA	HLA-DQA1	protein_coding	0.988503	2.70561e-05	Positive
linc-GPR141-2	ncRNA	CREBZF	protein_coding	0.984414	5.77644e-05	Positive
linc_luo_1108	ncRNA	CD46	protein_coding	0.983384	6.77437e-05	Positive
linc_luo_1108	ncRNA	TRPM7	protein_coding	0.987212	3.52759e-05	Positive
linc_luo_1108	ncRNA	SMC5	protein_coding	0.98565	4.70174e-05	Positive
FAS	protein_coding	uc003jox.1	ncRNA	0.986037	4.39153e-05	Positive
FAS	protein_coding	linc-PAX8-3	ncRNA	0.981985	8.28578e-05	Positive
FAS	protein_coding	AK094210	ncRNA	-0.980388	0.000102373	Negative
FAS	protein_coding	uc010fnw.1	ncRNA	0.983739	6.41947e-05	Positive
LOC100506123	ncRNA	NAIP	protein_coding	0.982265	7.96834e-05	Positive
uc001jmq.1	ncRNA	TIA1	protein_coding	0.980309	0.000103402	Positive
uc001jmq.1	ncRNA	TTC14	protein_coding	0.99548	2.63142e-06	Positive
uc001jmq.1	ncRNA	PANK2	protein_coding	0.99043	1.71211e-05	Positive
uc001jmq.1	ncRNA	ZMAT1	protein_coding	0.991945	1.1135e-05	Positive
uc001els.1	ncRNA	LUC7L3	protein_coding	0.989308	2.25737e-05	Positive
CLEC2B	protein_coding	linc-PEX13	ncRNA	0.985508	4.81819e-05	Positive
CLEC2B	protein_coding	BX537573	ncRNA	0.984444	5.74901e-05	Positive
uc001stp.1	ncRNA	GADD45B	protein_coding	0.989793	2.01075e-05	Positive
uc001stp.1	ncRNA	OXR1	protein_coding	0.98164	8.68706e-05	Positive
ITGA7	protein_coding	uc010fnw.1	ncRNA	-0.987818	3.12524e-05	Negative
DOCK4	protein_coding	BC041991	ncRNA	0.981887	8.39854e-05	Positive
AF086343	ncRNA	ANGPT2	protein_coding	0.981762	8.5436e-05	Positive
AF086343	ncRNA	NPAT	protein_coding	0.992178	1.03482e-05	Positive
linc_luo_1506	ncRNA	ANGPT2	protein_coding	0.983674	6.48379e-05	Positive
linc_luo_1506	ncRNA	RAPGEF5	protein_coding	0.98059	9.97664e-05	Positive
linc_luo_1506	ncRNA	RGS16	protein_coding	0.990974	1.47953e-05	Positive
linc_luo_1506	ncRNA	ZNF331	protein_coding	0.984427	5.76395e-05	Positive
linc_luo_1506	ncRNA	PGAP1	protein_coding	0.980631	9.92379e-05	Positive
linc_luo_1506	ncRNA	NPAT	protein_coding	0.996453	1.43691e-06	Positive
linc_luo_1506	ncRNA	RANBP2	protein_coding	0.981813	8.48379e-05	Positive
linc_luo_1506	ncRNA	TIMP4	protein_coding	-0.985863	4.52938e-05	Negative
linc_luo_1506	ncRNA	SKIL	protein_coding	0.981712	8.60254e-05	Positive
linc_luo_1506	ncRNA	PIGK	protein_coding	0.989292	2.26564e-05	Positive
linc_luo_1506	ncRNA	RNF217	protein_coding	0.98458	5.62387e-05	Positive
linc_luo_1506	ncRNA	RAP2A	protein_coding	0.985601	4.74136e-05	Positive
linc-STIM2-3	ncRNA	TTC21B	protein_coding	0.980198	0.000104857	Positive
AC127904.2	ncRNA	ANKRD36C	protein_coding	0.983408	6.75049e-05	Positive
RP11-627D16.1	ncRNA	KIAA1033	protein_coding	0.984027	6.14022e-05	Positive
RP11-627D16.1	ncRNA	SNX7	protein_coding	0.988527	2.69129e-05	Positive
RP11-627D16.1	ncRNA	CHML	protein_coding	0.981438	8.92685e-05	Positive
MYO1B	protein_coding	RP11-627D16.1	ncRNA	0.99201	1.0912e-05	Positive
CFD	protein_coding	linc-TOR1AIP2-3	ncRNA	0.981052	9.39646e-05	Positive
CFD	protein_coding	CR592158	ncRNA	-0.987792	3.14216e-05	Negative
CFD	protein_coding	linc-SPRY3-4	ncRNA	0.980613	9.94722e-05	Positive
LINC00312	ncRNA	ANKRD36C	protein_coding	0.982914	7.26267e-05	Positive
BC042520	ncRNA	IFIT3	protein_coding	0.984016	6.15078e-05	Positive
WDR75	protein_coding	BC029474	ncRNA	0.981505	8.8467e-05	Positive
WDR75	protein_coding	linc-AKT3-4	ncRNA	-0.987003	3.67281e-05	Negative
WDR75	protein_coding	linc-KCP	ncRNA	-0.981921	8.3595e-05	Negative
AMPH	protein_coding	linc-REXO1L1	ncRNA	0.982553	7.65007e-05	Positive
PTGER3	protein_coding	linc-HSF2-1	ncRNA	0.987085	3.6158e-05	Positive
PTGER3	protein_coding	uc001stp.1	ncRNA	0.988052	2.97813e-05	Positive
ALCAM	protein_coding	linc-HSF2-1	ncRNA	0.982759	7.42715e-05	Positive
AK000203	ncRNA	TIA1	protein_coding	0.987112	3.5969e-05	Positive
AK000203	ncRNA	FNBP4	protein_coding	0.996471	1.41859e-06	Positive
AK000203	ncRNA	ANKRD36	protein_coding	0.995092	3.23221e-06	Positive
AK000203	ncRNA	ANKRD36B	protein_coding	0.986697	3.89268e-05	Positive
AK000203	ncRNA	DMTF1	protein_coding	0.981912	8.37e-05	Positive
PJA2	protein_coding	uc003jka.1	ncRNA	0.983463	6.69511e-05	Positive
Y13807	ncRNA	SOX5	protein_coding	0.987595	3.26975e-05	Positive
LINC01112	protein_coding	CR625009	ncRNA	0.984273	5.90754e-05	Positive
DMTF1	protein_coding	LOC101928020	ncRNA	0.994001	5.33587e-06	Positive
DMTF1	protein_coding	AK000203	ncRNA	0.981501	8.85089e-05	Positive
MKLN1	protein_coding	CR621840	ncRNA	0.982925	7.25106e-05	Positive
GK5	protein_coding	AJ227894	ncRNA	0.983631	6.52687e-05	Positive
uc003jym.1	ncRNA	ANKRD36B	protein_coding	0.987398	3.40092e-05	Positive
uc003jym.1	ncRNA	CAST	protein_coding	0.988011	3.00312e-05	Positive
uc003jym.1	ncRNA	TAS2R30	protein_coding	0.987858	3.09987e-05	Positive
PLA2R1	protein_coding	uc003jka.1	ncRNA	0.987623	3.25145e-05	Positive
VCP	protein_coding	RP11-107I14.5	ncRNA	0.98262	7.57764e-05	Positive
VCP	protein_coding	linc-VEZF1	ncRNA	-0.984576	5.62821e-05	Negative
GPRC5B	protein_coding	linc_luo_948	ncRNA	-0.990343	1.75091e-05	Negative
GPRC5B	protein_coding	X92108	ncRNA	-0.981926	8.35367e-05	Negative
GPRC5B	protein_coding	LINC00310	ncRNA	-0.986274	4.20849e-05	Negative
MBOAT2	protein_coding	linc-CCDC146-3	ncRNA	0.990701	1.59338e-05	Positive
MBOAT2	protein_coding	linc-GPR141-2	ncRNA	0.99316	7.40537e-06	Positive
PTPLAD2	protein_coding	linc-PAX8-3	ncRNA	0.984593	5.61267e-05	Positive
PTPLAD2	protein_coding	uc003jka.1	ncRNA	0.989775	2.01946e-05	Positive
PTPLAD2	protein_coding	uc001uoa.1	ncRNA	0.98209	8.16614e-05	Positive
PTPLAD2	protein_coding	linc_luo_1506	ncRNA	0.987738	3.17674e-05	Positive
AOX1	protein_coding	linc_luo_1759	ncRNA	-0.980896	9.58912e-05	Negative
AOX1	protein_coding	uc001stp.1	ncRNA	-0.986485	4.04868e-05	Negative
GOLGA8Q	protein_coding	linc-VEZF1	ncRNA	0.988325	2.81105e-05	Positive
GOLGA8Q	protein_coding	LINC00598	ncRNA	0.986028	4.39849e-05	Positive
CAPZA1	protein_coding	linc-PPWD1	ncRNA	-0.98067	9.87414e-05	Negative
CAPZA1	protein_coding	LINC01212	ncRNA	-0.980416	0.00010201	Negative
ATP1A2	protein_coding	uc003qmb.2	ncRNA	-0.990225	1.80498e-05	Negative
CR623291	ncRNA	AMPH	protein_coding	-0.988426	2.75089e-05	Negative
CR623291	ncRNA	PDE10A	protein_coding	0.980633	9.92151e-05	Positive
AY029324	ncRNA	FLNC	protein_coding	-0.988027	2.99352e-05	Negative
AY029324	ncRNA	DCLRE1C	protein_coding	0.994785	3.76139e-06	Positive
CEBPZ	protein_coding	CR592158	ncRNA	0.985348	4.95239e-05	Positive
GADD45B	protein_coding	uc001stp.1	ncRNA	0.991215	1.38297e-05	Positive
PGM2	protein_coding	uc003qmb.2	ncRNA	0.981726	8.58621e-05	Positive
PGM2	protein_coding	uc010fnw.1	ncRNA	0.991142	1.41171e-05	Positive
uc003lqz.2	ncRNA	DMTF1	protein_coding	0.98989	1.96343e-05	Positive
ENST00000544086	ncRNA	MKX	protein_coding	0.982832	7.3493e-05	Positive
ENST00000544086	ncRNA	KIAA1377	protein_coding	0.983835	6.32614e-05	Positive
ENST00000544086	ncRNA	PTGER3	protein_coding	0.992996	7.85531e-06	Positive
uc010hci.2	ncRNA	ANKRD36C	protein_coding	0.991511	1.26933e-05	Positive
uc010hci.2	ncRNA	GK5	protein_coding	0.985334	4.9639e-05	Positive
FTX	ncRNA	ANKRD36B	protein_coding	0.980061	0.000106669	Positive
FTX	ncRNA	CAST	protein_coding	0.980434	0.00010178	Positive
FTX	ncRNA	DMTF1	protein_coding	0.985261	5.02586e-05	Positive
ID4	protein_coding	linc_luo_1076	ncRNA	0.982078	8.17996e-05	Positive
ID4	protein_coding	AF086343	ncRNA	0.989698	2.05779e-05	Positive
ID4	protein_coding	linc_luo_1506	ncRNA	0.989216	2.30621e-05	Positive
ANKRD10-IT1	ncRNA	ANKRD36B	protein_coding	0.99456	4.18018e-06	Positive
ANKRD10-IT1	ncRNA	TTC14	protein_coding	0.981615	8.71553e-05	Positive
linc-CGGBP1-2	ncRNA	GLRB	protein_coding	0.980087	0.000106326	Positive
P2RY14	protein_coding	linc-SPRY3-2	ncRNA	0.984401	5.78822e-05	Positive
FIBIN	protein_coding	linc-TOR1AIP2-3	ncRNA	0.984901	5.33726e-05	Positive
PPM1A	protein_coding	linc-ANKRD20A1-8	ncRNA	0.990802	1.55096e-05	Positive
CTD-2334D19.1	ncRNA	RBP4	protein_coding	-0.983361	6.79819e-05	Negative
CTD-2334D19.1	ncRNA	ATF6	protein_coding	0.986692	3.89607e-05	Positive
FILIP1	protein_coding	linc-REXO1L1	ncRNA	0.985942	4.467e-05	Positive
CR600262	ncRNA	ITGB8	protein_coding	0.990536	1.66504e-05	Positive
CR600262	ncRNA	TSPAN7	protein_coding	-0.980775	9.74217e-05	Negative
MGAT4C	protein_coding	uc003jox.1	ncRNA	0.984242	5.93648e-05	Positive
MGAT4C	protein_coding	linc-PAX8-3	ncRNA	0.995605	2.45341e-06	Positive
MGAT4C	protein_coding	uc003jka.1	ncRNA	0.993553	6.38851e-06	Positive
GPCPD1	protein_coding	linc-AKT3-4	ncRNA	-0.989017	2.41373e-05	Negative
uc010ijm.1	ncRNA	CD58	protein_coding	0.984961	5.28413e-05	Positive
PTGER3	protein_coding	ENST00000544086	ncRNA	0.989915	1.95127e-05	Positive
NR2F2	protein_coding	LINC01197	ncRNA	0.984009	6.15759e-05	Positive
AK056941	ncRNA	ANKRD36	protein_coding	0.980605	9.95712e-05	Positive
AK056941	ncRNA	SAT1	protein_coding	0.984084	6.0863e-05	Positive
BAZ1A	protein_coding	linc_luo_1076	ncRNA	0.988387	2.7738e-05	Positive
BAZ1A	protein_coding	linc-C14orf102-1	ncRNA	-0.984783	5.44129e-05	Negative
BAZ1A	protein_coding	linc-PEX13	ncRNA	0.983734	6.42451e-05	Positive
LINC00670	ncRNA	PTCH1	protein_coding	-0.98223	8.00855e-05	Negative
linc_luo_734	ncRNA	ANKRD36B	protein_coding	0.983555	6.6025e-05	Positive
linc_luo_734	ncRNA	CAST	protein_coding	0.993043	7.72563e-06	Positive
SMC4	protein_coding	linc-ANKRD20A1-8	ncRNA	0.985281	5.00841e-05	Positive
NFE2L3	protein_coding	AK058157	ncRNA	0.98878	2.5456e-05	Positive
NFE2L3	protein_coding	LINC00598	ncRNA	0.991948	1.11251e-05	Positive
PLEKHH2	protein_coding	RP1-213J1P__B.2	ncRNA	-0.985805	4.57588e-05	Negative
LAMA2	protein_coding	linc-ANKRD20A1-8	ncRNA	-0.983691	6.46724e-05	Negative
LAMA2	protein_coding	uc003jox.1	ncRNA	-0.988134	2.92734e-05	Negative
ZNF117	protein_coding	linc-WASH1-2	ncRNA	-0.98363	6.52728e-05	Negative
ZNF117	protein_coding	AK126477	ncRNA	0.981231	9.17694e-05	Positive
uc001elt.1	ncRNA	ADRA1D	protein_coding	-0.982442	7.77198e-05	Negative
uc001elt.1	ncRNA	FLNC	protein_coding	-0.987438	3.37427e-05	Negative
SAMD9L	protein_coding	uc001uoa.1	ncRNA	0.981374	9.00392e-05	Positive
ENPP1	protein_coding	linc-REXO1L1	ncRNA	0.992223	1.02028e-05	Positive
ENPP1	protein_coding	AK094210	ncRNA	0.983485	6.67247e-05	Positive
SAT1	protein_coding	linc-WASH1-2	ncRNA	-0.982472	7.7393e-05	Negative
SAT1	protein_coding	ENST00000432268	ncRNA	0.981548	8.7949e-05	Positive
MIR548D1	ncRNA	C2CD3	protein_coding	0.98036	0.00010274	Positive
CR604135	ncRNA	RBM43	protein_coding	0.983782	6.37735e-05	Positive
CR604135	ncRNA	IFIH1	protein_coding	0.982038	8.22515e-05	Positive
BC017894	ncRNA	DMTF1	protein_coding	0.986199	4.26571e-05	Positive
ARRDC4	protein_coding	LINC01197	ncRNA	0.992697	8.72014e-06	Positive
WSB1	protein_coding	linc-RANBP3L-5	ncRNA	0.9839	6.2627e-05	Positive
WSB1	protein_coding	AK021887	ncRNA	0.9932	7.29568e-06	Positive
WSB1	protein_coding	MIR548O2	ncRNA	0.986768	3.84097e-05	Positive
WSB1	protein_coding	AF494233	ncRNA	0.985195	5.08222e-05	Positive
WSB1	protein_coding	linc-ARID1B-2	ncRNA	0.989878	1.9691e-05	Positive
WSB1	protein_coding	AK000203	ncRNA	0.983272	6.88906e-05	Positive
WSB1	protein_coding	uc003lqz.2	ncRNA	0.980862	9.63215e-05	Positive
WSB1	protein_coding	FTX	ncRNA	0.989725	2.04428e-05	Positive
WSB1	protein_coding	FOXP1-IT1	ncRNA	0.984461	5.73327e-05	Positive
WSB1	protein_coding	BC017894	ncRNA	0.993657	6.13258e-06	Positive
BC010059	ncRNA	LUC7L3	protein_coding	0.985106	5.15833e-05	Positive
BC010059	ncRNA	MBOAT2	protein_coding	0.993939	5.47595e-06	Positive
EIF1AX	protein_coding	uc001uoa.1	ncRNA	0.980422	0.000101932	Positive
MOB3B	protein_coding	CR604135	ncRNA	0.98739	3.40626e-05	Positive
RP11-370K11.1	ncRNA	CAST	protein_coding	0.988721	2.57942e-05	Positive
ADH1C	protein_coding	LOC100506123	ncRNA	0.982758	7.42804e-05	Positive
ETNK1	protein_coding	AC017002.4	ncRNA	-0.983811	6.34965e-05	Negative
ETNK1	protein_coding	RP11-586L23.1	ncRNA	-0.997601	5.407e-07	Negative
ETNK1	protein_coding	linc_luo_95	ncRNA	0.984434	5.75769e-05	Positive
THSD7A	protein_coding	AK055059	ncRNA	0.989415	2.20123e-05	Positive
IGKV2D-40	protein_coding	CR600756	ncRNA	-0.98632	4.17305e-05	Negative
PHLDA1	protein_coding	linc-PPWD1	ncRNA	-0.980225	0.000104503	Negative
TLR3	protein_coding	linc-PPWD1	ncRNA	-0.980644	9.90791e-05	Negative
EPS8	protein_coding	uc003jka.1	ncRNA	0.98766	3.22765e-05	Positive
PDGFRA	protein_coding	RP11-627D16.1	ncRNA	0.986849	3.78237e-05	Positive
TFRC	protein_coding	linc-SLC39A10-10	ncRNA	0.98341	6.74867e-05	Positive
linc-LPA-1	ncRNA	ADRA2C	protein_coding	0.982224	8.01431e-05	Positive
linc-LPA-1	ncRNA	IL1B	protein_coding	-0.983153	7.01138e-05	Negative
linc-LPA-1	ncRNA	ENPEP	protein_coding	-0.990478	1.69053e-05	Negative
linc-LPA-1	ncRNA	IFIT1	protein_coding	-0.982572	7.62933e-05	Negative
linc-LPA-1	ncRNA	DDX60	protein_coding	-0.98939	2.21461e-05	Negative
linc-LPA-1	ncRNA	SP100	protein_coding	-0.994666	3.97946e-06	Negative
linc-LPA-1	ncRNA	DDX58	protein_coding	-0.991757	1.17979e-05	Negative
linc-LPA-1	ncRNA	SLC22A3	protein_coding	0.992442	9.50061e-06	Positive
linc-LPA-1	ncRNA	TNFAIP3	protein_coding	-0.981009	9.44954e-05	Negative
linc-LPA-1	ncRNA	SAMSN1	protein_coding	-0.987103	3.60292e-05	Negative
linc-LPA-1	ncRNA	FAS	protein_coding	-0.981451	8.91059e-05	Negative
linc-LPA-1	ncRNA	ITGA7	protein_coding	0.982956	7.21801e-05	Positive
linc-LPA-1	ncRNA	CAPZA1	protein_coding	-0.980504	0.000100872	Negative
linc-LPA-1	ncRNA	PGM2	protein_coding	-0.981587	8.74934e-05	Negative
linc-LPA-1	ncRNA	TLR3	protein_coding	-0.982867	7.31256e-05	Negative
RP11-642D21.1	ncRNA	C2CD3	protein_coding	0.983994	6.172e-05	Positive
ERV3-1	protein_coding	uc002yup.1	ncRNA	0.990316	1.76324e-05	Positive
TNFAIP3	protein_coding	linc-LPA-1	ncRNA	-0.982046	8.21639e-05	Negative
XIST	ncRNA	RGS16	protein_coding	0.981461	8.89897e-05	Positive
XIST	ncRNA	ST6GALNAC5	protein_coding	0.984039	6.12846e-05	Positive
XIST	ncRNA	ZNF331	protein_coding	0.992868	8.22022e-06	Positive
XIST	ncRNA	SLC2A3	protein_coding	0.981853	8.4383e-05	Positive
XIST	ncRNA	RANBP2	protein_coding	0.982087	8.1698e-05	Positive
XIST	ncRNA	TIMP4	protein_coding	-0.984494	5.70269e-05	Negative
XIST	ncRNA	LMBRD2	protein_coding	0.982593	7.6068e-05	Positive
XIST	ncRNA	PIGK	protein_coding	0.980147	0.000105536	Positive
XIST	ncRNA	RNF217	protein_coding	0.995134	3.16421e-06	Positive
XIST	ncRNA	C1orf95	protein_coding	-0.993379	6.82778e-06	Negative
XIST	ncRNA	PPP1R1A	protein_coding	-0.987437	3.37491e-05	Negative
XIST	ncRNA	PJA2	protein_coding	0.995526	2.56468e-06	Positive
XIST	ncRNA	PTPLAD2	protein_coding	0.993529	6.4478e-06	Positive
XIST	ncRNA	SLC2A14	protein_coding	0.994444	4.40607e-06	Positive
XIST	ncRNA	MGAT4C	protein_coding	0.995139	3.15589e-06	Positive
XIST	ncRNA	EPS8	protein_coding	0.984936	5.30613e-05	Positive
SERPINE2	protein_coding	uc010fnw.1	ncRNA	0.986888	3.75495e-05	Positive
AL109711	ncRNA	ANKRD36	protein_coding	0.981778	8.52546e-05	Positive
AL109711	ncRNA	DMTF1	protein_coding	0.983985	6.18106e-05	Positive
AL109711	ncRNA	WSB1	protein_coding	0.993982	5.37806e-06	Positive
AK127959	ncRNA	TTN	protein_coding	0.985812	4.56999e-05	Positive
AK127959	ncRNA	ZMAT1	protein_coding	0.980645	9.907e-05	Positive
AK127959	ncRNA	ZNF10	protein_coding	0.992375	9.71238e-06	Positive
DSEL	protein_coding	XIST	ncRNA	0.986139	4.31192e-05	Positive
linc-FAM75A7-31	ncRNA	LDOC1	protein_coding	0.980825	9.67875e-05	Positive
linc-FAM75A7-31	ncRNA	PGM5	protein_coding	0.990359	1.74402e-05	Positive
PANK2	protein_coding	LOC101928020	ncRNA	0.99384	5.70227e-06	Positive
PANK2	protein_coding	uc001jmq.1	ncRNA	0.986497	4.03969e-05	Positive
PANK2	protein_coding	uc003jym.1	ncRNA	0.99166	1.21449e-05	Positive
PANK2	protein_coding	BC036606	ncRNA	0.983198	6.96482e-05	Positive
LINC00597	ncRNA	FNBP4	protein_coding	0.989255	2.28522e-05	Positive
LINC00597	ncRNA	ANKRD36	protein_coding	0.982024	8.24066e-05	Positive
TEX9	protein_coding	XIST	ncRNA	0.987588	3.27438e-05	Positive
XIST	ncRNA	SERPINE2	protein_coding	0.980797	9.71452e-05	Positive
XIST	ncRNA	DSEL	protein_coding	0.984667	5.54518e-05	Positive
XIST	ncRNA	TEX9	protein_coding	0.988779	2.54651e-05	Positive
BC027222	ncRNA	DMTF1	protein_coding	0.993289	7.06121e-06	Positive
BC027222	ncRNA	WSB1	protein_coding	0.994942	3.48484e-06	Positive
SYTL2	protein_coding	AK125592	ncRNA	0.992967	7.93767e-06	Positive
HSPA1B	protein_coding	uc004bzx.1	ncRNA	0.99092	1.50179e-05	Positive
HSPB6	protein_coding	AK126477	ncRNA	-0.984426	5.76494e-05	Negative
linc-GPR27-4	ncRNA	CAPZA1	protein_coding	-0.983725	6.43326e-05	Negative
linc-GPR27-4	ncRNA	GPR183	protein_coding	-0.982126	8.12499e-05	Negative
linc-TGIF2LY-2	ncRNA	RNF217	protein_coding	-0.981617	8.71398e-05	Negative
linc-TGIF2LY-2	ncRNA	ZNF148	protein_coding	-0.993899	5.56566e-06	Negative
linc-TGIF2LY-2	ncRNA	THAP2	protein_coding	-0.988651	2.61952e-05	Negative
linc-TGIF2LY-2	ncRNA	PJA2	protein_coding	-0.984746	5.47433e-05	Negative
linc-TGIF2LY-2	ncRNA	PTPLAD2	protein_coding	-0.983615	6.54245e-05	Negative
linc-TGIF2LY-2	ncRNA	SLC2A14	protein_coding	-0.981921	8.3595e-05	Negative
linc-TGIF2LY-2	ncRNA	ITGA1	protein_coding	-0.988685	2.59994e-05	Negative
linc-TGIF2LY-2	ncRNA	CHURC1	protein_coding	-0.989515	2.15017e-05	Negative
linc-TGIF2LY-2	ncRNA	DSEL	protein_coding	-0.98618	4.28079e-05	Negative
AK001903	ncRNA	B3GALT2	protein_coding	0.980776	9.74067e-05	Positive
NOP58	protein_coding	CR592158	ncRNA	0.990265	1.78675e-05	Positive
uc003srb.1	ncRNA	EDNRA	protein_coding	0.987383	3.41116e-05	Positive
uc003srb.1	ncRNA	EIF1AX	protein_coding	0.988351	2.79565e-05	Positive
ZMAT1	protein_coding	LOC101928020	ncRNA	0.985457	4.86097e-05	Positive
ZMAT1	protein_coding	RSF1-IT2	ncRNA	0.981334	9.05171e-05	Positive
ZMAT1	protein_coding	uc003lqz.2	ncRNA	0.990614	1.63095e-05	Positive
ZMAT1	protein_coding	BC027222	ncRNA	0.984906	5.33222e-05	Positive
SORBS1	protein_coding	CR604135	ncRNA	-0.985614	4.73081e-05	Negative
AC073218.3	ncRNA	DMTF1	protein_coding	0.981727	8.58419e-05	Positive
AC073218.3	ncRNA	WSB1	protein_coding	0.993871	5.63064e-06	Positive

## Sheet: degree of gene
Gene Symbol	Gene_Discription	style	Biotype	Degree
uc003jka.1		down	ncRNA	26
uc003jox.1		down	ncRNA	24
XIST	X inactive specific transcript (non-protein coding)	down	ncRNA	21
linc-LPA-1		up	ncRNA	16
linc-PPWD1		up	ncRNA	12
uc003pju.1		down	ncRNA	11
ZMAT1	zinc finger, matrin-type 1	down	protein_coding	11
AK094210		up	ncRNA	11
ANKRD36B	ankyrin repeat domain 36B	down	protein_coding	11
ANKRD36C	ankyrin repeat domain 36C	down	protein_coding	11
linc_luo_1076		down	ncRNA	11
linc-AMPD2		down	ncRNA	11
linc-BPY2B-4		down	ncRNA	11
PANK2	pantothenate kinase 2	down	protein_coding	11
uc001iqe.2		down	ncRNA	11
CAPRIN2	caprin family member 2	down	protein_coding	10
TIA1	TIA1 cytotoxic granule-associated RNA binding protein	down	protein_coding	10
linc_luo_1013		down	ncRNA	9
linc_luo_795		down	ncRNA	9
linc-TGIF2LY-2		up	ncRNA	9
linc-TOR1AIP2-3		up	ncRNA	9
NSUN6	NOP2/Sun domain family, member 6	down	protein_coding	9
TTC14	tetratricopeptide repeat domain 14	down	protein_coding	9
X54707		up	ncRNA	9
linc_luo_1183		down	ncRNA	8
linc_luo_1759		down	ncRNA	8
linc-GPR141-2		down	ncRNA	8
LOC101928020	uncharacterized LOC101928020	down	ncRNA	8
RP11-259O2.3	putative novel transcript	down	ncRNA	8
RP11-586L23.1	novel transcript	up	ncRNA	8
uc010fnw.1		down	ncRNA	8
AK000203		down	ncRNA	7
ALG13	ALG13, UDP-N-acetylglucosaminyltransferase subunit	down	protein_coding	7
CCNL1	cyclin L1	down	protein_coding	7
CPAMD8	C3 and PZP-like, alpha-2-macroglobulin domain containing 8	up	protein_coding	7
ENPEP	glutamyl aminopeptidase (aminopeptidase A)	down	protein_coding	7
KB-1930G5.3	putative novel transcript	up	ncRNA	7
KIAA1033	KIAA1033	down	protein_coding	7
linc_luo_771		down	ncRNA	7
linc_luo_95		down	ncRNA	7
linc-ANKRD20A1-8		down	ncRNA	7
linc-JAK1-1		down	ncRNA	7
linc-LBX1-2		up	ncRNA	7
RASA2	RAS p21 protein activator 2	down	protein_coding	7
SAT1	spermidine/spermine N1-acetyltransferase 1	down	protein_coding	7
THOC1	THO complex 1	down	protein_coding	7
uc001uoa.1		down	ncRNA	7
ZNF226	zinc finger protein 226	down	protein_coding	7
ANKRD10-IT1	ANKRD10 intronic transcript 1 (non-protein coding)	down	ncRNA	6
CAST	calpastatin	down	protein_coding	6
CR609342		down	ncRNA	6
DYNC2H1	dynein, cytoplasmic 2, heavy chain 1	down	protein_coding	6
FNBP4	formin binding protein 4	down	protein_coding	6
GCC2	GRIP and coiled-coil domain containing 2	down	protein_coding	6
linc-AKT3-4		up	ncRNA	6
linc-ARID1B-2		down	ncRNA	6
linc-GRB14		down	ncRNA	6
linc-PEX13		down	ncRNA	6
linc-PLD5-4		down	ncRNA	6
linc-RANBP3L-5		down	ncRNA	6
linc-SLC39A10-10		down	ncRNA	6
linc-TEKT4-1		down	ncRNA	6
MIR548D1	microRNA 548d-1	down	ncRNA	6
NDUFB2	NADH dehydrogenase (ubiquinone) 1 beta subcomplex, 2, 8kDa	down	protein_coding	6
NPAT	nuclear protein, ataxia-telangiectasia locus	down	protein_coding	6
PTPLAD2	protein tyrosine phosphatase-like A domain containing 2	down	protein_coding	6
RBM26	RNA binding motif protein 26	down	protein_coding	6
RNF217	ring finger protein 217	down	protein_coding	6
SLC2A3	solute carrier family 2 (facilitated glucose transporter), member 3	down	protein_coding	6
AOC3	amine oxidase, copper containing 3	up	protein_coding	5
APCDD1	adenomatosis polyposis coli down-regulated 1	up	protein_coding	5
BC033713		down	ncRNA	5
C6orf15	chromosome 6 open reading frame 15	up	protein_coding	5
CD46	CD46 molecule, complement regulatory protein	down	protein_coding	5
CEP290	centrosomal protein 290kDa	down	protein_coding	5
FAS	Fas cell surface death receptor	down	protein_coding	5
HLA-C	major histocompatibility complex, class I, C	down	protein_coding	5
linc-KCP		up	ncRNA	5
linc-REXO1L1		up	ncRNA	5
linc-TCERG1L-1		up	ncRNA	5
LOC100506123	uncharacterized LOC100506123	down	ncRNA	5
MFAP4	microfibrillar-associated protein 4	up	protein_coding	5
PIP5K1C	phosphatidylinositol-4-phosphate 5-kinase, type I, gamma	up	protein_coding	5
PPIP5K2	diphosphoinositol pentakisphosphate kinase 2	down	protein_coding	5
RANBP2	RAN binding protein 2	down	protein_coding	5
RGPD6	RANBP2-like and GRIP domain containing 6	down	protein_coding	5
RGPD8	RANBP2-like and GRIP domain containing 8	down	protein_coding	5
RGS16	regulator of G-protein signaling 16	down	protein_coding	5
RP11-627D16.1		down	ncRNA	5
RP5-826L7.1	putative novel transcript	down	ncRNA	5
SELENBP1	selenium binding protein 1	up	protein_coding	5
ST6GALNAC5	ST6 (alpha-N-acetyl-neuraminyl-2,3-beta-galactosyl-1,3)-N-acetylgalactosaminide alpha-2,6-sialyltransferase 5	down	protein_coding	5
TIMP4	TIMP metallopeptidase inhibitor 4	up	protein_coding	5
TRPM7	transient receptor potential cation channel, subfamily M, member 7	down	protein_coding	5
uc001jmq.1		down	ncRNA	5
uc001stp.1		down	ncRNA	5
uc002xjm.2		down	ncRNA	5
X92108		down	ncRNA	5
ZNF280D	zinc finger protein 280D	down	protein_coding	5
ADRA2C	adrenoceptor alpha 2C	up	protein_coding	4
AF086041		down	ncRNA	4
AJ227894		down	ncRNA	4
AK026828		down	ncRNA	4
ALDH1B1	aldehyde dehydrogenase 1 family, member B1	up	protein_coding	4
BC041991		down	ncRNA	4
BRE-AS1	BRE antisense RNA 1	down	ncRNA	4
C1orf95	chromosome 1 open reading frame 95	up	protein_coding	4
CAPZA1	capping protein (actin filament) muscle Z-line, alpha 1	down	protein_coding	4
CLEC10A	C-type lectin domain family 10, member A	up	protein_coding	4
CR604135		down	ncRNA	4
CREBZF	CREB/ATF bZIP transcription factor	down	protein_coding	4
DUSP27	dual specificity phosphatase 27 (putative)	up	protein_coding	4
ENST00000544086		down	ncRNA	4
FLNC	filamin C, gamma	up	protein_coding	4
FTX	FTX transcript, XIST regulator (non-protein coding)	down	ncRNA	4
HLA-DQA1	major histocompatibility complex, class II, DQ alpha 1	down	protein_coding	4
HSPB1	heat shock 27kDa protein 1	up	protein_coding	4
JMJD1C	jumonji domain containing 1C	down	protein_coding	4
linc-ARHGAP11B-2		down	ncRNA	4
linc-CCDC146-3		down	ncRNA	4
linc-FCGR1A-3		down	ncRNA	4
linc-HSF2-1		down	ncRNA	4
linc-OR4F29-1		down	ncRNA	4
LMBRD2	LMBR1 domain containing 2	down	protein_coding	4
MGAT4C	mannosyl (alpha-1,3-)-glycoprotein beta-1,4-N-acetylglucosaminyltransferase, isozyme C (putative)	down	protein_coding	4
MIR548O2	microRNA 548o-2	down	ncRNA	4
PGAP1	post-GPI attachment to proteins 1	down	protein_coding	4
PIBF1	progesterone immunomodulatory binding factor 1	down	protein_coding	4
PPP1R1A	protein phosphatase 1, regulatory (inhibitor) subunit 1A	up	protein_coding	4
PTGER3	prostaglandin E receptor 3 (subtype EP3)	down	protein_coding	4
RB1CC1	RB1-inducible coiled-coil 1	down	protein_coding	4
RP11-1018N14.3	novel transcript	down	ncRNA	4
RP1-213J1P__B.2	putative novel transcript	up	ncRNA	4
SMCHD1	structural maintenance of chromosomes flexible hinge domain containing 1	down	protein_coding	4
U54734		down	ncRNA	4
uc003jym.1		down	ncRNA	4
VPREB3	pre-B lymphocyte 3	up	protein_coding	4
ZNF331	zinc finger protein 331	down	protein_coding	4
ZNF638	zinc finger protein 638	down	protein_coding	4
ZNF704	zinc finger protein 704	down	protein_coding	4
AF085868		down	ncRNA	3
AF086343		down	ncRNA	3
AK126477		down	ncRNA	3
AK127959		down	ncRNA	3
AL109711		down	ncRNA	3
ANKRD12	ankyrin repeat domain 12	down	protein_coding	3
ASB2	ankyrin repeat and SOCS box containing 2	up	protein_coding	3
ATF7IP	activating transcription factor 7 interacting protein	down	protein_coding	3
BAZ1A	bromodomain adjacent to zinc finger domain, 1A	down	protein_coding	3
BC027222		down	ncRNA	3
BIVM	basic, immunoglobulin-like variable motif containing	down	protein_coding	3
BX537573		down	ncRNA	3
C9orf72	chromosome 9 open reading frame 72	down	protein_coding	3
CAPN7	calpain 7	down	protein_coding	3
CFD	complement factor D (adipsin)	up	protein_coding	3
CHRM4	cholinergic receptor, muscarinic 4	up	protein_coding	3
CLEC2D	C-type lectin domain family 2, member D	down	protein_coding	3
CLOCK	clock circadian regulator	down	protein_coding	3
CR590573		down	ncRNA	3
CR596712		up	ncRNA	3
CR625890		down	ncRNA	3
DDX60	DEAD (Asp-Glu-Ala-Asp) box polypeptide 60	down	protein_coding	3
DQ786204		down	ncRNA	3
DSEL	dermatan sulfate epimerase-like	down	protein_coding	3
ETNK1	ethanolamine kinase 1	down	protein_coding	3
GADD45B	growth arrest and DNA-damage-inducible, beta	down	protein_coding	3
GPRC5B	G protein-coupled receptor, class C, group 5, member B	up	protein_coding	3
HSPB6	heat shock protein, alpha-crystallin-related, B6	up	protein_coding	3
ID4	inhibitor of DNA binding 4, dominant negative helix-loop-helix protein	down	protein_coding	3
IL1B	interleukin 1, beta	down	protein_coding	3
ITM2C	integral membrane protein 2C	up	protein_coding	3
KCNIP3	Kv channel interacting protein 3, calsenilin	up	protein_coding	3
KCTD9	potassium channel tetramerization domain containing 9	down	protein_coding	3
LARP7	La ribonucleoprotein domain family, member 7	down	protein_coding	3
linc_luo_1108		down	ncRNA	3
linc_luo_1704		down	ncRNA	3
LINC00342	long intergenic non-protein coding RNA 342	down	ncRNA	3
LINC00478	long intergenic non-protein coding RNA 478	down	ncRNA	3
linc-VEZF1		down	ncRNA	3
LY75	lymphocyte antigen 75	down	protein_coding	3
MBOAT2	membrane bound O-acyltransferase domain containing 2	down	protein_coding	3
NR_024415		down	ncRNA	3
PAXBP1	PAX3 and PAX7 binding protein 1	down	protein_coding	3
PGM2	phosphoglucomutase 2	down	protein_coding	3
PIGK	phosphatidylinositol glycan anchor biosynthesis, class K	down	protein_coding	3
PJA2	praja ring finger 2, E3 ubiquitin protein ligase	down	protein_coding	3
RASGEF1B	RasGEF domain family, member 1B	down	protein_coding	3
RPE	ribulose-5-phosphate-3-epimerase	down	protein_coding	3
SAMSN1	SAM domain, SH3 domain and nuclear localization signals 1	down	protein_coding	3
SLC5A3	solute carrier family 5 (sodium/myo-inositol cotransporter), member 3	down	protein_coding	3
SMC5	structural maintenance of chromosomes 5	down	protein_coding	3
SNX7	sorting nexin 7	down	protein_coding	3
SOHLH1	spermatogenesis and oogenesis specific basic helix-loop-helix 1	up	protein_coding	3
SP100	SP100 nuclear antigen	down	protein_coding	3
TAS2R13	taste receptor, type 2, member 13	down	protein_coding	3
TAS2R30	taste receptor, type 2, member 30	down	protein_coding	3
TTN	titin	down	protein_coding	3
uc003hsl.1		down	ncRNA	3
uc003lqz.2		down	ncRNA	3
uc003qmb.2		down	ncRNA	3
uc003wwa.2		down	ncRNA	3
uc004afc.2		down	ncRNA	3
WDR75	WD repeat domain 75	down	protein_coding	3
ZFYVE16	zinc finger, FYVE domain containing 16	down	protein_coding	3
AC010745.2	novel transcript	up	ncRNA	2
AC073218.3		down	ncRNA	2
ADAMTS4	ADAM metallopeptidase with thrombospondin type 1 motif, 4	down	protein_coding	2
AF086507		down	ncRNA	2
AK021606		down	ncRNA	2
AK021887		down	ncRNA	2
AK056941		down	ncRNA	2
AK058157		down	ncRNA	2
AL079289		down	ncRNA	2
AMPH	amphiphysin	up	protein_coding	2
ANGPT2	angiopoietin 2	down	protein_coding	2
ANKRD44	ankyrin repeat domain 44	down	protein_coding	2
AOX1	aldehyde oxidase 1	up	protein_coding	2
ATP11C	ATPase, class VI, type 11C	down	protein_coding	2
ATP1B3	ATPase, Na+/K+ transporting, beta 3 polypeptide	down	protein_coding	2
AY029324		down	ncRNA	2
BAG2	BCL2-associated athanogene 2	up	protein_coding	2
BC010059		down	ncRNA	2
BC017894		down	ncRNA	2
BCLAF1	BCL2-associated transcription factor 1	down	protein_coding	2
BIRC2	baculoviral IAP repeat containing 2	down	protein_coding	2
BTG2	BTG family, member 2	down	protein_coding	2
C12orf4	chromosome 12 open reading frame 4	down	protein_coding	2
C1orf110	chromosome 1 open reading frame 110	down	protein_coding	2
C2CD3	C2 calcium-dependent domain containing 3	down	protein_coding	2
CCDC14	coiled-coil domain containing 14	down	protein_coding	2
CCDC186	coiled-coil domain containing 186	down	protein_coding	2
CCNH	cyclin H	down	protein_coding	2
CD58	CD58 molecule	down	protein_coding	2
CENPC	centromere protein C	down	protein_coding	2
CHD1	chromodomain helicase DNA binding protein 1	down	protein_coding	2
CHMP1B	charged multivesicular body protein 1B	down	protein_coding	2
CLEC2B	C-type lectin domain family 2, member B	down	protein_coding	2
CNN1	calponin 1, basic, smooth muscle	up	protein_coding	2
CR600262		down	ncRNA	2
CR623291		down	ncRNA	2
CR627153		down	ncRNA	2
CR749491		down	ncRNA	2
CTD-2334D19.1	novel transcript	down	ncRNA	2
DDX58	DEAD (Asp-Glu-Ala-Asp) box polypeptide 58	down	protein_coding	2
DES	desmin	up	protein_coding	2
DNAJB14	DnaJ (Hsp40) homolog, subfamily B, member 14	down	protein_coding	2
ECM2	extracellular matrix protein 2, female organ and adipocyte specific	down	protein_coding	2
EGR3	early growth response 3	down	protein_coding	2
EIF1AX	eukaryotic translation initiation factor 1A, X-linked	down	protein_coding	2
ENPP1	ectonucleotide pyrophosphatase/phosphodiesterase 1	up	protein_coding	2
EPPK1	epiplakin 1	up	protein_coding	2
EPS8	epidermal growth factor receptor pathway substrate 8	down	protein_coding	2
FAR1	fatty acyl CoA reductase 1	down	protein_coding	2
GALNT16	polypeptide N-acetylgalactosaminyltransferase 16	up	protein_coding	2
GK5	glycerol kinase 5 (putative)	down	protein_coding	2
GOLGA8Q	golgin A8 family, member Q	down	protein_coding	2
IER3	immediate early response 3	down	protein_coding	2
IL31RA	interleukin 31 receptor A	up	protein_coding	2
ITGA7	integrin, alpha 7	up	protein_coding	2
LAMA2	laminin, alpha 2	up	protein_coding	2
linc_luo_1157		down	ncRNA	2
linc_luo_2019		down	ncRNA	2
linc_luo_734		down	ncRNA	2
linc_luo_930		down	ncRNA	2
LINC00310	long intergenic non-protein coding RNA 310	down	ncRNA	2
LINC00597	long intergenic non-protein coding RNA 597	down	ncRNA	2
LINC00598	novel transcript	down	ncRNA	2
LINC01197	long intergenic non-protein coding RNA 1197	down	ncRNA	2
LINC01212	long intergenic non-protein coding RNA 1212	up	ncRNA	2
linc-FAHD2B-5		down	ncRNA	2
linc-FAM108B1		up	ncRNA	2
linc-FAM75A7-31		up	ncRNA	2
linc-GPR27-4		up	ncRNA	2
linc-PLD1-2		down	ncRNA	2
linc-SPRY3-4		up	ncRNA	2
linc-TBCB		up	ncRNA	2
linc-WASH1-2		up	ncRNA	2
LUC7L3	LUC7-like 3 (S. cerevisiae)	down	protein_coding	2
MIR548AA2	microRNA 548aa-2	down	ncRNA	2
MIS18BP1	MIS18 binding protein 1	down	protein_coding	2
MOSPD2	motile sperm domain containing 2	down	protein_coding	2
NABP1	nucleic acid binding protein 1	down	protein_coding	2
NAIP	NLR family, apoptosis inhibitory protein	down	protein_coding	2
NEMF	nuclear export mediator factor	down	protein_coding	2
NFE2L3	nuclear factor, erythroid 2-like 3	down	protein_coding	2
NR4A2	nuclear receptor subfamily 4, group A, member 2	down	protein_coding	2
NRARP	NOTCH-regulated ankyrin repeat protein	down	protein_coding	2
NTN1	netrin 1	up	protein_coding	2
PDE3A	phosphodiesterase 3A, cGMP-inhibited	down	protein_coding	2
PPP1R15B	protein phosphatase 1, regulatory subunit 15B	down	protein_coding	2
PRMT9	protein arginine methyltransferase 9	down	protein_coding	2
PTPN12	protein tyrosine phosphatase, non-receptor type 12	down	protein_coding	2
PYGB	phosphorylase, glycogen; brain	up	protein_coding	2
RAP2A	RAP2A, member of RAS oncogene family	down	protein_coding	2
RAPGEF5	Rap guanine nucleotide exchange factor (GEF) 5	down	protein_coding	2
RGPD1	RANBP2-like and GRIP domain containing 1	down	protein_coding	2
RNF149	ring finger protein 149	down	protein_coding	2
RP11-554D13.1	novel transcript	down	ncRNA	2
RP11-834C11.10		up	ncRNA	2
S1PR3	sphingosine-1-phosphate receptor 3	up	protein_coding	2
SCFD1	sec1 family domain containing 1	down	protein_coding	2
SENP7	SUMO1/sentrin specific peptidase 7	down	protein_coding	2
SERPINE2	serpin peptidase inhibitor, clade E (nexin, plasminogen activator inhibitor type 1), member 2	down	protein_coding	2
SGK1	serum/glucocorticoid regulated kinase 1	down	protein_coding	2
SKIL	SKI-like proto-oncogene	down	protein_coding	2
SLC22A3	solute carrier family 22 (organic cation transporter), member 3	up	protein_coding	2
SLC2A14	solute carrier family 2 (facilitated glucose transporter), member 14	down	protein_coding	2
SLC33A1	solute carrier family 33 (acetyl-CoA transporter), member 1	down	protein_coding	2
SLC35F5	solute carrier family 35, member F5	down	protein_coding	2
SOCS3	suppressor of cytokine signaling 3	down	protein_coding	2
TAS2R20	taste receptor, type 2, member 20	down	protein_coding	2
TEX9	testis expressed 9	down	protein_coding	2
TFPI	tissue factor pathway inhibitor (lipoprotein-associated coagulation inhibitor)	down	protein_coding	2
THAP2	THAP domain containing, apoptosis associated protein 2	down	protein_coding	2
TLR3	toll-like receptor 3	down	protein_coding	2
TMF1	TATA element modulatory factor 1	down	protein_coding	2
TMOD2	tropomodulin 2 (neuronal)	down	protein_coding	2
TNFAIP3	tumor necrosis factor, alpha-induced protein 3	down	protein_coding	2
uc001elb.3		down	ncRNA	2
uc001elt.1		down	ncRNA	2
uc003srb.1		down	ncRNA	2
uc003xel.1		down	ncRNA	2
uc010hci.2		down	ncRNA	2
uc011bfh.1		down	ncRNA	2
uc011cts.1		down	ncRNA	2
VCP	valosin containing protein	up	protein_coding	2
ZFAND5	zinc finger, AN1-type domain 5	down	protein_coding	2
ZNF117	zinc finger protein 117	down	protein_coding	2
ZNF678	zinc finger protein 678	down	protein_coding	2
ZRANB2	zinc finger, RAN-binding domain containing 2	down	protein_coding	2
AC023128.1	putative novel transcript	down	ncRNA	1
AC092171.4	novel transcript	up	ncRNA	1
AC100848.1	novel transcript	down	ncRNA	1
AC127904.2	novel transcript	down	ncRNA	1
AC138035.1	novel transcript	down	ncRNA	1
ACTC1	actin, alpha, cardiac muscle 1	up	protein_coding	1
ADH1C	alcohol dehydrogenase 1C (class I), gamma polypeptide	down	protein_coding	1
ADRA1D	adrenoceptor alpha 1D	up	protein_coding	1
AF070595		down	ncRNA	1
AF088050		down	ncRNA	1
AF494233		down	ncRNA	1
AK001903		down	ncRNA	1
AK026778		down	ncRNA	1
AK055059		down	ncRNA	1
AK091489		down	ncRNA	1
AK092622		down	ncRNA	1
AK125592		down	ncRNA	1
AK130482		down	ncRNA	1
ALCAM	activated leukocyte cell adhesion molecule	down	protein_coding	1
ANKRD44-IT1	ANKRD44 intronic transcript 1 (non-protein coding)	down	ncRNA	1
ARHGEF6	Rac/Cdc42 guanine nucleotide exchange factor (GEF) 6	down	protein_coding	1
ARID5A	AT rich interactive domain 5A (MRF1-like)	up	protein_coding	1
ARL5B	ADP-ribosylation factor-like 5B	down	protein_coding	1
ARRDC3	arrestin domain containing 3	down	protein_coding	1
ARRDC4	arrestin domain containing 4	down	protein_coding	1
ATF6	activating transcription factor 6	down	protein_coding	1
ATP1A2	ATPase, Na+/K+ transporting, alpha 2 polypeptide	up	protein_coding	1
ATP6V1D	ATPase, H+ transporting, lysosomal 34kDa, V1 subunit D	down	protein_coding	1
AX721062		down	ncRNA	1
B3GALT2	UDP-Gal:betaGlcNAc beta 1,3-galactosyltransferase, polypeptide 2	down	protein_coding	1
BC026277		down	ncRNA	1
BC036606		down	ncRNA	1
BC038203		down	ncRNA	1
BC042084		up	ncRNA	1
BC042520		down	ncRNA	1
BC047912		down	ncRNA	1
BROX	BRO1 domain and CAAX motif containing	down	protein_coding	1
BTG3	BTG family, member 3	up	protein_coding	1
BVES	blood vessel epicardial substance	up	protein_coding	1
CARTPT	CART prepropeptide	up	protein_coding	1
CEBPZ	CCAAT/enhancer binding protein (C/EBP), zeta	down	protein_coding	1
CECR7	cat eye syndrome chromosome region, candidate 7 (non-protein coding)	up	ncRNA	1
CEP162	centrosomal protein 162kDa	down	protein_coding	1
CEP95	centrosomal protein 95kDa	down	protein_coding	1
CHML	choroideremia-like (Rab escort protein 2)	down	protein_coding	1
CHURC1	churchill domain containing 1	down	protein_coding	1
CIR1	corepressor interacting with RBPJ, 1	down	protein_coding	1
CKAP2	cytoskeleton associated protein 2	down	protein_coding	1
CR600756		down	ncRNA	1
CR613639		down	ncRNA	1
CR621840		down	ncRNA	1
CR625009		down	ncRNA	1
CREB5	cAMP responsive element binding protein 5	up	protein_coding	1
CXCL8	chemokine (C-X-C motif) ligand 8	down	protein_coding	1
CYP4B1	cytochrome P450, family 4, subfamily B, polypeptide 1	up	protein_coding	1
DCLRE1C	DNA cross-link repair 1C	down	protein_coding	1
DOCK4	dedicator of cytokinesis 4	down	protein_coding	1
DPYD-IT1	DPYD intronic transcript 1 (non-protein coding)	down	ncRNA	1
EDNRA	endothelin receptor type A	down	protein_coding	1
EGR2	early growth response 2	down	protein_coding	1
EML4	echinoderm microtubule associated protein like 4	down	protein_coding	1
ENST00000399971		down	ncRNA	1
ENST00000432268		down	ncRNA	1
ERV3-1	endogenous retrovirus group 3, member 1	down	protein_coding	1
FGF7	fibroblast growth factor 7	down	protein_coding	1
FIBIN	fin bud initiation factor homolog (zebrafish)	up	protein_coding	1
FILIP1	filamin A interacting protein 1	up	protein_coding	1
FOPNL	FGFR1OP N-terminal like	down	protein_coding	1
FOS	FBJ murine osteosarcoma viral oncogene homolog	down	protein_coding	1
FOSB	FBJ murine osteosarcoma viral oncogene homolog B	down	protein_coding	1
FOXP1-IT1	FOXP1 intronic transcript 1 (non-protein coding)	down	ncRNA	1
GAS2L3	growth arrest-specific 2 like 3	down	protein_coding	1
GLRB	glycine receptor, beta	down	protein_coding	1
GPCPD1	glycerophosphocholine phosphodiesterase GDE1 homolog (S. cerevisiae)	down	protein_coding	1
GPR183	G protein-coupled receptor 183	down	protein_coding	1
HLA-DRB4	major histocompatibility complex, class II, DR beta 4	down	protein_coding	1
HPD	4-hydroxyphenylpyruvate dioxygenase	up	protein_coding	1
HSPA1B	heat shock 70kDa protein 1B	down	protein_coding	1
ICAM1	intercellular adhesion molecule 1	down	protein_coding	1
IFIH1	interferon induced with helicase C domain 1	down	protein_coding	1
IFIT1	interferon-induced protein with tetratricopeptide repeats 1	down	protein_coding	1
IFIT3	interferon-induced protein with tetratricopeptide repeats 3	down	protein_coding	1
IFT74	intraflagellar transport 74 homolog (Chlamydomonas)	down	protein_coding	1
IFT80	intraflagellar transport 80 homolog (Chlamydomonas)	down	protein_coding	1
IGKV2D-40	immunoglobulin kappa variable 2D-40	up	protein_coding	1
IL6	interleukin 6	down	protein_coding	1
INSIG2	insulin induced gene 2	down	protein_coding	1
ITGA1	integrin, alpha 1	down	protein_coding	1
ITGB8	integrin, beta 8	down	protein_coding	1
JUNB	jun B proto-oncogene	down	protein_coding	1
KIAA1107	KIAA1107	down	protein_coding	1
KIAA1377	KIAA1377	down	protein_coding	1
KIAA1551	KIAA1551	down	protein_coding	1
KTN1	kinectin 1 (kinesin receptor)	down	protein_coding	1
LCORL	ligand dependent nuclear receptor corepressor-like	down	protein_coding	1
LDOC1	leucine zipper, down-regulated in cancer 1	up	protein_coding	1
linc_luo_1223		down	ncRNA	1
linc_luo_868		down	ncRNA	1
linc_luo_948		down	ncRNA	1
LINC00266-1	long intergenic non-protein coding RNA 266-1	down	ncRNA	1
LINC00312	long intergenic non-protein coding RNA 312	down	ncRNA	1
LINC00670	long intergenic non-protein coding RNA 670	up	ncRNA	1
LINC00960	long intergenic non-protein coding RNA 960	down	ncRNA	1
LINC01112	long intergenic non-protein coding RNA 1112	down	protein_coding	1
linc-ANKRD20A1-14		down	ncRNA	1
linc-CASP10-1		down	ncRNA	1
linc-CGGBP1-2		down	ncRNA	1
linc-CXorf49B-2		up	ncRNA	1
linc-EEPD1-3		down	ncRNA	1
linc-HNF1B-4		down	ncRNA	1
linc-SPRY3-2		up	ncRNA	1
linc-STIM2-3		down	ncRNA	1
LOC100507577	uncharacterized LOC100507577	down	ncRNA	1
LRRK2	leucine-rich repeat kinase 2	down	protein_coding	1
LYRM7	LYR motif containing 7	down	protein_coding	1
MAP1B	microtubule-associated protein 1B	up	protein_coding	1
MFHAS1	malignant fibrous histiocytoma amplified sequence 1	down	protein_coding	1
MICU3	mitochondrial calcium uptake family, member 3	down	protein_coding	1
MIR3117	microRNA 3117	down	ncRNA	1
MKLN1	muskelin 1, intracellular mediator containing kelch motifs	down	protein_coding	1
MKX	mohawk homeobox	down	protein_coding	1
MOB3B	MOB kinase activator 3B	down	protein_coding	1
MTPN	myotrophin	down	protein_coding	1
MYO1B	myosin IB	down	protein_coding	1
MYOC	myocilin, trabecular meshwork inducible glucocorticoid response	up	protein_coding	1
MYOCD	myocardin	up	protein_coding	1
NAP1L1	nucleosome assembly protein 1-like 1	down	protein_coding	1
NFIL3	nuclear factor, interleukin 3 regulated	down	protein_coding	1
NFKBIZ	nuclear factor of kappa light polypeptide gene enhancer in B-cells inhibitor, zeta	down	protein_coding	1
NOP58	NOP58 ribonucleoprotein	down	protein_coding	1
NR2F2	nuclear receptor subfamily 2, group F, member 2	down	protein_coding	1
NR4A1	nuclear receptor subfamily 4, group A, member 1	down	protein_coding	1
NR4A3	nuclear receptor subfamily 4, group A, member 3	down	protein_coding	1
ORC2	origin recognition complex, subunit 2	down	protein_coding	1
OXR1	oxidation resistance 1	down	protein_coding	1
P2RY14	purinergic receptor P2Y, G-protein coupled, 14	up	protein_coding	1
PCF11	PCF11 cleavage and polyadenylation factor subunit	down	protein_coding	1
PDE10A	phosphodiesterase 10A	down	protein_coding	1
PDGFRA	platelet-derived growth factor receptor, alpha polypeptide	down	protein_coding	1
PGM5	phosphoglucomutase 5	up	protein_coding	1
PHLDA1	pleckstrin homology-like domain, family A, member 1	down	protein_coding	1
PHTF2	putative homeodomain transcription factor 2	down	protein_coding	1
PLA2R1	phospholipase A2 receptor 1, 180kDa	down	protein_coding	1
PLEKHH2	pleckstrin homology domain containing, family H (with MyTH4 domain) member 2	down	protein_coding	1
PLGLB1	plasminogen-like B1	down	protein_coding	1
PLK2	polo-like kinase 2	down	protein_coding	1
POLK	polymerase (DNA directed) kappa	down	protein_coding	1
PPM1A	protein phosphatase, Mg2+/Mn2+ dependent, 1A	down	protein_coding	1
PTCH1	patched 1	down	protein_coding	1
PTGS2	prostaglandin-endoperoxide synthase 2 (prostaglandin G/H synthase and cyclooxygenase)	down	protein_coding	1
RASL12	RAS-like, family 12	up	protein_coding	1
RBM43	RNA binding motif protein 43	down	protein_coding	1
RBP4	retinol binding protein 4, plasma	up	protein_coding	1
REL	v-rel avian reticuloendotheliosis viral oncogene homolog	down	protein_coding	1
RGS2	regulator of G-protein signaling 2	down	protein_coding	1
RP11-107I14.5	novel transcript	up	ncRNA	1
RP11-370K11.1	novel transcript	down	ncRNA	1
RP11-642D21.1	putative novel transcript	down	ncRNA	1
RP4-614C15.2	putative novel transcript	up	ncRNA	1
RSF1-IT2	RSF1 intronic transcript 2 (non-protein coding)	down	ncRNA	1
SAMD9L	sterile alpha motif domain containing 9-like	down	protein_coding	1
SELE	selectin E	down	protein_coding	1
SESN3	sestrin 3	down	protein_coding	1
SIK1	salt-inducible kinase 1	down	protein_coding	1
SKIV2L2	superkiller viralicidic activity 2-like 2 (S. cerevisiae)	down	protein_coding	1
SLC20A1	solute carrier family 20 (phosphate transporter), member 1	down	protein_coding	1
SLC36A4	solute carrier family 36 (proton/amino acid symporter), member 4	down	protein_coding	1
SMC4	structural maintenance of chromosomes 4	down	protein_coding	1
SORBS1	sorbin and SH3 domain containing 1	up	protein_coding	1
SOX5	SRY (sex determining region Y)-box 5	down	protein_coding	1
STXBP3	syntaxin binding protein 3	down	protein_coding	1
SYAP1	synapse associated protein 1	down	protein_coding	1
SYTL2	synaptotagmin-like 2	down	protein_coding	1
TAS2R19	taste receptor, type 2, member 19	down	protein_coding	1
TAS2R50	taste receptor, type 2, member 50	down	protein_coding	1
TFRC	transferrin receptor	down	protein_coding	1
THSD7A	thrombospondin, type I, domain containing 7A	down	protein_coding	1
TMEM30B	transmembrane protein 30B	up	protein_coding	1
TNFRSF12A	tumor necrosis factor receptor superfamily, member 12A	up	protein_coding	1
TOB1	transducer of ERBB2, 1	down	protein_coding	1
TSPAN7	tetraspanin 7	up	protein_coding	1
TTC21B	tetratricopeptide repeat domain 21B	down	protein_coding	1
TTLL11	tubulin tyrosine ligase-like family, member 11	up	protein_coding	1
U2SURP	U2 snRNP-associated SURP domain containing	down	protein_coding	1
uc001els.1		down	ncRNA	1
uc002ujk.2		down	ncRNA	1
uc002yup.1		down	ncRNA	1
uc003tau.2		down	ncRNA	1
uc004ack.2		down	ncRNA	1
uc004bzx.1		down	ncRNA	1
uc010ijm.1		down	ncRNA	1
UGCG	UDP-glucose ceramide glucosyltransferase	down	protein_coding	1
USP15	ubiquitin specific peptidase 15	down	protein_coding	1
USP16	ubiquitin specific peptidase 16	down	protein_coding	1
UTRN	utrophin	down	protein_coding	1
WISP2	WNT1 inducible signaling pathway protein 2	up	protein_coding	1
Y13807		down	ncRNA	1
ZFP36	ZFP36 ring finger protein	down	protein_coding	1
ZNF10	zinc finger protein 10	down	protein_coding	1
ZNF107	zinc finger protein 107	down	protein_coding	1
ZNF141	zinc finger protein 141	down	protein_coding	1
ZNF148	zinc finger protein 148	down	protein_coding	1
ZNF600	zinc finger protein 600	down	protein_coding	1
